# Supplementary material
Source: PubMed Central journal article supplement (PMC4453777)
Supplement: supp_pp.15.00072_00072supp.pdf [file supp_pp.15.00072_00072supp.pdf]

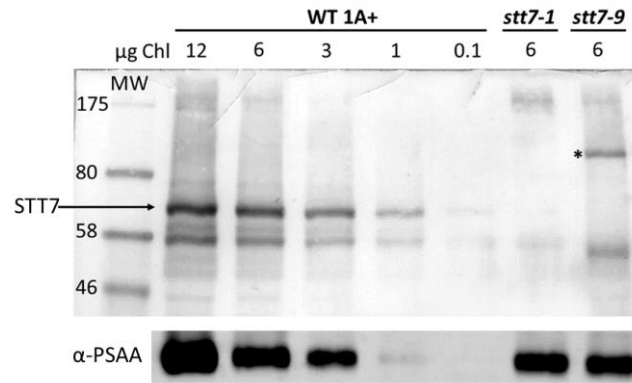

**Supplemental Figure 1:** Immunoblot detection of STT7 protein from *C. reinhardtii* thylakoid extracts using polyclonal  $\alpha$ -STT7 antibodies (prepared in rabbit against purified recombinant STT7) and alkaline phosphatase conjugated secondary antibody. The putative STT7-Arg7 fusion protein in *stt7-9* is indicated with \*. The membrane was probed with  $\alpha$ -PSAA antibodies and detected with chemiluminescence as a loading control.

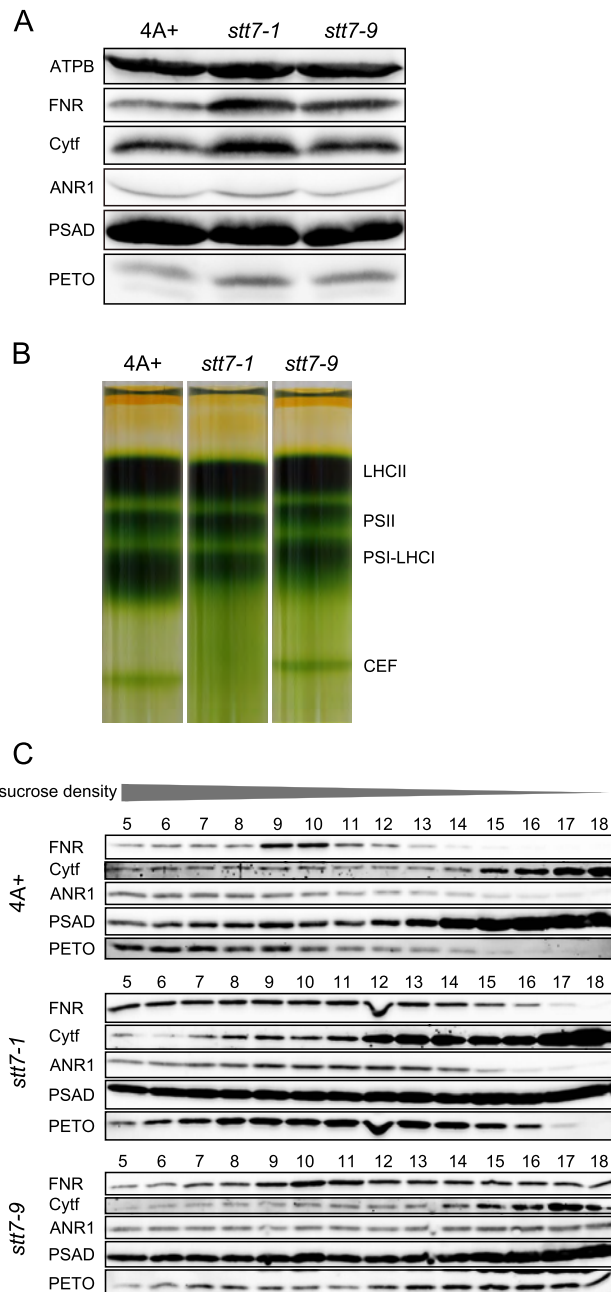

**Supplemental Figure 2:** STT7 deficiency alters organization and protein association of photosynthetic complexes.

**A:** Immunoblot analyses of thylakoid membranes (10  $\mu$ g chlorophyll) isolated from anaerobic wt 4A+, *stt7-1* and *stt7-9* cells grown photo-heterotrophically in low light.

**B:** SDS separation of  $\beta$ -solubilized thylakoids from 4A+, *stt7-1* and *stt7-9*

**C:** Polypeptides in SDS-fractions 5-18 were analyzed by immunoblotting using the indicated antibodies. 40  $\mu$ l volume of each fraction were loaded.

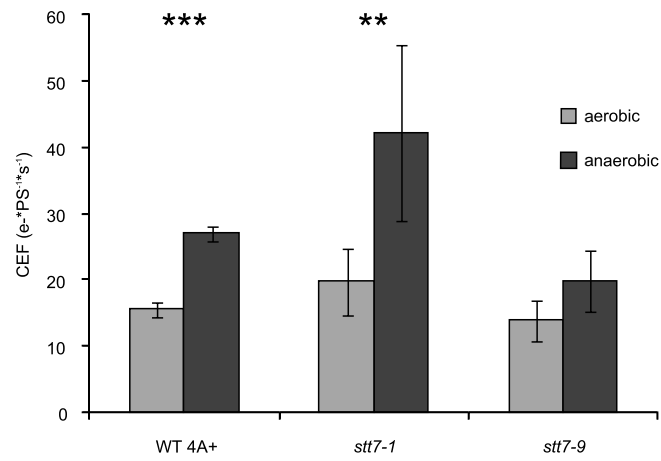

**Supplemental Figure 3:** CEF rates are significantly increased under anaerobic conditions in wt 4A+ and *stt7-1*. Results represent the average of three experiments. Significance was calculated using Student's t-test and is indicated as asterisks; \*\*:  $p \leq 0,01$ ; \*\*\*:  $p \leq 0,001$ .

### Supplemental Table 1: All phosphoproteins identified from *Chlamydomonas* thylakoids

Figures given indicate the number of MS/MS events that led to phosphopeptide identifications (spectrum counts at 5 % posterior error probability). They do not permit quantitative interpretations. Phosphoproteins that were identified with a total of less than ten spectrum counts across all experiments were omitted. AN, anaerobic; HL, high-light; Lit, localization according to Terashima et al., 2012; Pred, localization as predicted by PredAlgo (C: chloroplast, M: mitochondria, SP: secretory pathway, O: other); n/a, not available.

| Protein ID<br>(Augustus U10.2) | Short name | Protein description (JGI3) or conserved domains                                                                       | Localization |      | Treatment |        |        |     |        |        |
|--------------------------------|------------|-----------------------------------------------------------------------------------------------------------------------|--------------|------|-----------|--------|--------|-----|--------|--------|
|                                |            |                                                                                                                       | Lit          | Pred | AN        |        |        | HL  |        |        |
|                                |            |                                                                                                                       |              |      | WT        | STT7-9 | STT7-1 | WT  | STT7-9 | STT7-1 |
| Cre03.g175200.t1.1             | TOC75      | 75 kDa chloroplast membrane translocon                                                                                | C            | C    | 75        | 76     | 81     | 106 | 83     | 119    |
| Cre17.g720250.t1.1             | Lhcb4      | Lightharvesting chlorophylla/b binding protein Lhcb4                                                                  | C            | C    | 91        | 43     | 63     | 122 | 56     | 90     |
| Cre09.g416850.t1.1             | -          | (no conserved domains)                                                                                                | C            | M    | 79        | 75     | 129    | 54  | 48     | 79     |
| Cre06.g300550.t1.1             | -          | <i>Pfam: MORN repeat</i>                                                                                              | n/a          | O    | 85        | 64     | 50     | 105 | 91     | 65     |
| Cre02.g081250.t1.1             | -          | (no conserved domains)                                                                                                | C            | C    | 89        | 78     | 73     | 87  | 38     | 58     |
| Cre13.g601050.t1.2             | -          | <i>KOG:0978 E3 ubiquitin ligase involved in syntaxin degradation</i>                                                  | n/a          | C    | 68        | 81     | 96     | 72  | 86     | 16     |
| Cre10.g457650.t1.1             | -          | (no conserved domains)                                                                                                | n/a          | C    | 65        | 63     | 61     | 61  | 56     | 56     |
| Cre01.g004400.t1.1             | -          | (no conserved domains)                                                                                                | n/a          | SP   | 47        | 33     | 55     | 67  | 39     | 102    |
| Cre18.g748950.t1.1             | -          | (no conserved domains)                                                                                                | n/a          | C    | 47        | 48     | 49     | 61  | 54     | 52     |
| Cre26.g773100.t1.1             | -          | <i>Pfam:04755 PAP_Fibrillin</i>                                                                                       | C            | C    | 49        | 47     | 46     | 41  | 28     | 66     |
| Cre06.g261000.t1.1             | PsbR       | Photosystem II 10 kDa polypeptide                                                                                     | C            | C    | 39        | 44     | 49     | 55  | 35     | 43     |
| Cre10.g459200.t1.1             | PMA2       | Plasma membranetype proton ATPase                                                                                     | n/a          | O    | 21        | 16     | 18     | 71  | 78     | 51     |
| Cre01.g058700.t1.1             | TEF11      | S-Isoprenylcysteine O-methyltransferase                                                                               | C            | C    | 48        | 46     | 44     | 37  | 50     | 17     |
| Cre61.g792450.t1.2             | -          | (no conserved domains)                                                                                                | n/a          | M    | 50        | 40     | 51     | 41  | 11     | 44     |
| Cre17.g700750.t1.1             | -          | <i>Pfam:01184 GPR1/FUN34/yaaH family; KEGGORTH:07034 mannosyl-3-phosphoglycerate phosphatase; GO:0016020 membrane</i> | n/a          | O    | 3         | 6      | 1      | 78  | 89     | 48     |
| Cre02.g097950.t1.1             | -          | (no conserved domains)                                                                                                | n/a          | O    | 50        | 36     | 49     | 19  | 9      | 59     |
| Cre06.g263250.t1.2             | -          | (no conserved domains)                                                                                                | n/a          | O    | 75        | 64     | 28     | 27  | 5      | 19     |
| Cre16.g675300.t1.2             | MFT9       | <i>Major facilitator superfamily transporter</i>                                                                      | n/a          | C    | 50        | 32     | 35     | 37  | 34     | 30     |
| Cre14.g611300.t1.2             | COP3       | Light-gated proton channel rhodopsin                                                                                  | n/a          | SP   | 60        | 53     | 35     | 49  | 18     | 2      |
| DAA00966.1                     | CP43       | Photosystem II 44 kDa reaction center protein                                                                         | C            | C.e. | 20        | 23     | 50     | 28  | 25     | 68     |
| Cre12.g556250.t1.1             | SEP1       | Septinlike protein                                                                                                    | C            | O    | 35        | 70     | 41     | 19  | 22     | 19     |
| DAA00964.1                     | D2         | Photosystem II reaction center protein D2                                                                             | C            | C.e. | 13        | 19     | 46     | 32  | 31     | 60     |
| Cre12.g559450.t1.2             | -          | <i>Pfam:00168 C2 domain</i>                                                                                           | n/a          | O    | 43        | 29     | 46     | 32  | 24     | 26     |

| Protein ID<br>(Augustus U10.2) | Short<br>name | Protein description (JGI3) or conserved domains                                                                                             | Localization |      | Treatment |            |            |     |            |            |
|--------------------------------|---------------|---------------------------------------------------------------------------------------------------------------------------------------------|--------------|------|-----------|------------|------------|-----|------------|------------|
|                                |               |                                                                                                                                             | Lit          | Pred | AN        |            |            | HL  |            |            |
|                                |               |                                                                                                                                             |              |      | WT        | STT7-<br>9 | STT7-<br>1 | WT  | STT7-<br>9 | STT7-<br>1 |
| Cre13.g570350.t1.2             | AKC4          | ABC1like Kinase                                                                                                                             | n/a          | C    | 41        | 54         | 54         | 12  | 15         | 23         |
| Cre03.g186200.t1.1             | PCT1          | Phosphatidate cytidyltransferase                                                                                                            | n/a          | O    | 35        | 32         | 31         | 25  | 28         | 42         |
| Cre12.g540700.t1.2             | -             | hypothetical protein ( <i>no conserved domains</i> )                                                                                        | n/a          | C    | 23        | 28         | 30         | 53  | 38         | 18         |
| Cre06.g269050.t1.1             | CrTic62-NAD-1 | <i>Extended shortchain dehydrogenase similar to the NADbinding domain of Tic621</i>                                                         | n/a          | C    | 29        | 28         | 28         | 40  | 28         | 36         |
| Cre16.g668350.t1.1             | -             | <i>Pfam:07889 Protein of unknown function</i>                                                                                               | n/a          | M    | 32        | 29         | 31         | 40  | 18         | 33         |
| Cre20.g759250.t1.1             | -             | <i>Pfam:07059 Protein of unknown function (DUF1336)</i>                                                                                     | n/a          | O    | 33        | 40         | 33         | 36  | 15         | 16         |
| Cre16.g663600.t1.1             | -             | Carbohydrate transporter                                                                                                                    | n/a          | O    | 31        | 31         | 28         | 30  | 26         | 19         |
| Cre01.g021650.t1.1             | -             | ( <i>no conserved domains</i> )                                                                                                             | n/a          | O    | 35        | 41         | 35         | 15  | 17         | 21         |
| Cre04.g221550.t1.1             | -             | <i>Panther:13847 FAD NAD BINDING OXIDOREDUCTASES; Panther:13847:SF34 DEAMINASE-RELATED</i>                                                  | n/a          | C    | 10        | 17         | 35         | 27  | 18         | 53         |
| Cre33.g782800.t1.1             | NDA2          | TypeII calciumdependent NADH dehydrogenase                                                                                                  | n/a          | C    | 36        | 34         | 36         | 25  | 13         | 16         |
| Cre12.g530850.t1.2             | -             | ( <i>no conserved domains</i> )                                                                                                             | n/a          | SP   | 35        | 29         | 42         | 15  | 18         | 12         |
| Cre07.g325450.t1.2             | -             | <i>Pfam:06966 Å Protein of unknown function (DUF1295); KOG:4650 Predicted steroid reductase</i>                                             | n/a          | O    | 29        | 29         | 29         | 21  | 22         | 20         |
| Cre12.g538700.t1.1             | -             | <i>Pfam:07766 LETM1-like protein; Panther:14009 LEUCINE ZIPPER-EF-HAND CONTAINING TRANSMEMBRANE PROTEIN</i>                                 | C            | C    | 18        | 24         | 20         | 36  | 14         | 37         |
| Cre08.g367500.t1.1             | LHCSR3        | Stressrelated chlorophyll a/b binding protein 2                                                                                             | C            | C    | 0         | 0          | 0          | 129 | 14         | 0          |
| Cre10.g452450.t1.1             | TIC110        | <i>110 kDa translocon of chloroplast envelope inner membrane</i>                                                                            | n/a          | C    | 49        | 61         | 28         | 2   | 0          | 0          |
| Cre06.g261750.t1.1             | -             | <i>Pfam:01062 Bestrophin, KOG:4090 Uncharacterized conserved protein</i>                                                                    | n/a          | O    | 39        | 40         | 18         | 11  | 11         | 21         |
| Cre07.g336750.t1.2             | -             | <i>KOG:0978 E3 ubiquitin ligase involved in syntaxin degradation</i>                                                                        | n/a          | O    | 47        | 34         | 27         | 15  | 0          | 14         |
| Cre01.g044600.t1.1             | -             | <i>Panther:10774:SF28; Panther:10774 CALCIUM-DEPENDENT LIPID-BINDING PROTEIN (CALB RELATED); KOG:4744 Uncharacterized conserved protein</i> | n/a          | O    | 36        | 22         | 11         | 38  | 9          | 20         |
| Cre07.g340450.t1.2             | PKHD1-1       | Fibrocystinlike protein                                                                                                                     | n/a          | SP   | 29        | 11         | 47         | 36  | 0          | 11         |
| Cre11.g477950.t1.2             | -             | ( <i>no conserved domains</i> )                                                                                                             | n/a          | SP   | 28        | 30         | 9          | 28  | 14         | 23         |
| Cre12.g552550.t1.2             | -             | ( <i>no conserved domains</i> )                                                                                                             | n/a          | O    | 18        | 19         | 20         | 24  | 22         | 24         |
| Cre01.g071450.t1.2             | -             | <i>Pfam:00069 Protein kinase domain; Pfam:01846 FF domain</i>                                                                               | n/a          | C    | 37        | 24         | 33         | 12  | 4          | 9          |
| Cre14.g614000.t1.2             | CGL17         | Predicted protein                                                                                                                           | n/a          | C    | 12        | 12         | 9          | 31  | 40         | 10         |
| Cre06.g259100.t1.2             | -             | <i>KEG0978 E3 ubiquitin ligase involved in syntaxin degradation</i>                                                                         | n/a          | C    | 15        | 20         | 21         | 18  | 30         | 9          |
| Cre10.g436550.t1.1             | LCI5          | lowCO2inducible protein                                                                                                                     | n/a          | C    | 12        | 12         | 37         | 8   | 7          | 35         |
| Cre12.g498550.t1.2             | CHLM          | <i>Mg protoporphyrin IX S-adenosyl methionine Omethyl transferase</i>                                                                       | C            | O    | 25        | 47         | 25         | 7   | 7          | 0          |

| Protein ID<br>(Augustus U10.2)                 | Short<br>name | Protein description (JGI3) or conserved domains                                         | Localization |            | Treatment |            |            |    |            |            |
|------------------------------------------------|---------------|-----------------------------------------------------------------------------------------|--------------|------------|-----------|------------|------------|----|------------|------------|
|                                                |               |                                                                                         | Lit          | Pred       | AN        |            |            | HL |            |            |
|                                                |               |                                                                                         |              |            | WT        | STT7-<br>9 | STT7-<br>1 | WT | STT7-<br>9 | STT7-<br>1 |
| Cre05.g244900.t1.2                             | -             | <i>Pfam:01594 Domain of unknown function DUF20; Panther:21716 TRANSMEMBRANE PROTEIN</i> | n/a          | C          | 17        | 22         | 20         | 18 | 16         | 16         |
| Cre12.g558600.t1.1                             | -             | (no conserved domains)                                                                  | C            | O          | 21        | 15         | 17         | 26 | 6          | 23         |
| Cre05.g247950.t1.1                             | -             | (no conserved domains)                                                                  | n/a          | M          | 29        | 33         | 19         | 12 | 14         | 0          |
| Cre14.g617300.t1.1                             | PSL3          | Signal peptide peptidase-like protein                                                   | C            | C          | 20        | 19         | 12         | 18 | 21         | 16         |
| Cre01.g061800.t1.1                             | GSD1          | Glutamic-gamma-semialdehyde dehydrogenase                                               | n/a          | C          | 23        | 21         | 18         | 17 | 18         | 7          |
| Cre12.g500400.t1.1                             | -             | <i>KOG:0977 Nuclear envelope protein lamin, intermediate filament superfamily</i>       | n/a          | O          | 30        | 23         | 21         | 11 | 2          | 15         |
| Cre12.g500500.t1.2                             | SMT1          | Sterol C24 methyltransferase                                                            | n/a          | O          | 35        | 34         | 13         | 12 | 6          | 0          |
| Cre07.g330250.t1.1                             | PSAH          | Subunit H of photosystem I                                                              | C            | C          | 24        | 16         | 30         | 8  | 14         | 7          |
| Cre09.g398400.t1.1                             | TRP5          | Transient receptor potential ion channel protein                                        | n/a          | O          | 16        | 12         | 0          | 14 | 53         | 0          |
| Cre17.g729450.t1.1                             | -             | <i>Pfam:00571 CBS domain; Pfam:00654 voltage gated chloride channel</i>                 | n/a          | C          | 17        | 19         | 15         | 22 | 18         | 4          |
| Cre06.g281600.t1.1                             | LCI23         | Low CO2 inducible protein                                                               | n/a          | M          | 0         | 0          | 0          | 28 | 1          | 65         |
| Cre01.g026900.t1.1                             | SSA14         | Monoxygenase                                                                            | C            | C          | 13        | 15         | 16         | 18 | 19         | 13         |
| 1) Cre05.g243550.t1.1<br>2) Cre05.g243650.t1.1 | -             | 1) Hypothetical protein (no conserved domains) 2) (no conserved domains)                | 1)C<br>2)O   | 1)O<br>2)O | 15        | 11         | 11         | 30 | 21         | 5          |
| Cre15.g645000.t1.1                             | MRP2          | ABC transporter, multidrug resistance associated protein                                | n/a          | O          | 19        | 17         | 17         | 18 | 18         | 4          |
| Cre10.g448650.t1.2                             | -             | <i>Pfam:00781 Diacylglycerol kinase catalytic domain (and others..)</i>                 | n/a          | O          | 12        | 19         | 2          | 20 | 21         | 18         |
| Cre29.g778350.t1.1                             | -             | (no conserved domains)                                                                  | n/a          | M          | 34        | 9          | 9          | 25 | 10         | 4          |
| Cre03.g199000.t1.1                             | PHOT          | Phototropin                                                                             | n/a          | C          | 24        | 20         | 23         | 8  | 10         | 6          |
| Cre02.g094250.t1.1                             | -             | <i>Pfam:00153 Mitochondrial carrier protein</i>                                         | n/a          | O          | 19        | 12         | 10         | 17 | 31         | 2          |
| Cre02.g076900.t1.1                             | CGK2          | cGMP-dependent Protein Kinase                                                           | n/a          | O          | 13        | 27         | 8          | 12 | 15         | 15         |
| Cre12.g539000.t1.1                             | ECT1          | CDP ethanolamine synthase                                                               | n/a          | SP         | 21        | 9          | 16         | 15 | 17         | 12         |
| Cre17.g708000.t1.2                             | FAP260        | Flagellar Associated Membrane Protein                                                   | n/a          | C          | 16        | 18         | 21         | 17 | 5          | 13         |
| Cre01.g038100.t1.1                             | -             | <i>Pfam:01062 Bestrophin</i>                                                            | n/a          | C          | 5         | 9          | 1          | 33 | 29         | 12         |
| Cre12.g492350.t1.1                             | -             | <i>Pfam: 01963 TraB family</i>                                                          | C            | O          | 16        | 29         | 23         | 1  | 12         | 8          |
| Cre04.g229300.t1.2                             | RCA1          | Rubisco activase                                                                        | n/a          | C          | 9         | 7          | 15         | 20 | 15         | 22         |
| Cre03.g171100.t1.2                             | -             | (no conserved domains)                                                                  | n/a          | C          | 25        | 25         | 17         | 11 | 6          | 2          |
| Cre12.g485900.t1.1                             | -             | (no conserved domains)                                                                  | n/a          | O          | 19        | 16         | 18         | 18 | 9          | 4          |
| Cre16.g657850.t1.1                             | SEC63         | ER-targeted preprotein translocase subunit                                              | C            | SP         | 21        | 21         | 11         | 11 | 9          | 9          |
| Cre03.g155100.t1.1                             | -             | (no conserved domains)                                                                  | n/a          | M          | 28        | 45         | 8          | 0  | 0          | 0          |
| Cre12.g488500.t1.1                             | ARC6          | ARC6-like protein                                                                       | n/a          | C          | 16        | 45         | 14         | 0  | 6          | 0          |

| Protein ID<br>(Augustus U10.2)                 | Short<br>name | Protein description (JGI3) or conserved domains                                                                                                                                                                                                                                   | Localization |            | Treatment |            |            |    |            |            |
|------------------------------------------------|---------------|-----------------------------------------------------------------------------------------------------------------------------------------------------------------------------------------------------------------------------------------------------------------------------------|--------------|------------|-----------|------------|------------|----|------------|------------|
|                                                |               |                                                                                                                                                                                                                                                                                   | Lit          | Pred       | AN        |            |            | HL |            |            |
|                                                |               |                                                                                                                                                                                                                                                                                   |              |            | WT        | STT7-<br>9 | STT7-<br>1 | WT | STT7-<br>9 | STT7-<br>1 |
| Cre01.g044650.t1.1                             | -             | <i>Panther:10774 CALCIUM-DEPENDENT LIPID-BINDING PROTEIN (CALB RELATED)</i>                                                                                                                                                                                                       | n/a          | C          | 17        | 16         | 9          | 13 | 9          | 17         |
| Cre07.g325550.t1.1                             | KDG3          | diacylglycerol kinase                                                                                                                                                                                                                                                             | n/a          | O          | 18        | 25         | 10         | 13 | 6          | 8          |
| 1) Cre02.g120250.t1.1<br>2) Cre02.g120200.t1.1 | STT7          | <i>Chloroplast protein kinase required for LHCII phosphorylation and state transition</i>                                                                                                                                                                                         | 1)C          | 1)C<br>2)C | 27        | 14         | 0          | 28 | 11         | 0          |
| Cre12.g490700.t1.1                             | MIN1          | Minieyespot protein                                                                                                                                                                                                                                                               | n/a          | O          | 17        | 30         | 23         | 6  | 0          | 3          |
| Cre06.g280950.t1.1                             | PYK2          | Pyruvate kinase                                                                                                                                                                                                                                                                   | n/a          | O          | 31        | 9          | 8          | 18 | 6          | 6          |
| Cre06.g262900.t1.1                             | PFK1          | Phosphofructokinase family protein                                                                                                                                                                                                                                                | C            | C          | 14        | 8          | 10         | 16 | 20         | 9          |
| Cre09.g402950.t1.2                             | CGL21         | Conserved protein of unknown function                                                                                                                                                                                                                                             | n/a          | C          | 17        | 16         | 8          | 21 | 12         | 2          |
| Cre17.g726350.t1.2                             | -             | <i>Pfam:01940 Integral membrane protein DUF92 (...and more)</i>                                                                                                                                                                                                                   | n/a          | C          | 15        | 22         | 18         | 8  | 7          | 6          |
| Cre02.g102450.t1.1                             | -             | <i>Pfam:00400 WD domain, G-beta repeat (...and others)</i>                                                                                                                                                                                                                        | n/a          | SP         | 17        | 15         | 15         | 10 | 6          | 13         |
| Cre02.g140700.t1.1                             | -             | <i>Pfam:02656 Domain of unknown function DUF; Pfam:03105 SPX domain; Pfam:09359 VTC domain; Panther:10783 XENOTROPIC AND POLYTROPIC MURINE LEUKEMIA VIRUS RECEPTOR; Panther:10783:SF20; KOG:1161 Protein involved in vacuolar polyphosphate accumulation, contains SPX domain</i> | C            | O          | 15        | 16         | 12         | 14 | 8          | 11         |
| Cre06.g281900.t1.1                             | ZIL2          | ZIP family transporter                                                                                                                                                                                                                                                            | n/a          | SP         | 15        | 13         | 20         | 8  | 8          | 9          |
| Cre16.g678650.t1.1                             | -             | <i>(no conserved domains)</i>                                                                                                                                                                                                                                                     | n/a          | O          | 22        | 35         | 15         | 0  | 0          | 0          |
| Cre16.g653700.t1.2                             | -             | <i>Pfam:01237 Oxysterol-binding protein</i>                                                                                                                                                                                                                                       | n/a          | M          | 24        | 15         | 12         | 5  | 3          | 13         |
| Cre06.g273250.t1.1                             | -             | <i>Pfam:01553 Acyltransferase</i>                                                                                                                                                                                                                                                 | n/a          | C          | 15        | 17         | 12         | 11 | 8          | 9          |
| Cre07.g352350.t1.1                             | -             | <i>Pfam:01434 Peptidase family M41; Pfam:00004 ATPase family associated with various cellular activities (AAA); Panther:23076 METALLOPROTEASE M41 FTSH (...and others)</i>                                                                                                        | n/a          | C          | 11        | 1          | 25         | 8  | 9          | 17         |
| Cre02.g130650.t1.1                             | -             | Inorganic pyrophosphatase                                                                                                                                                                                                                                                         | C            | SP         | 2         | 6          | 5          | 22 | 16         | 18         |
| Cre13.g604150.t1.1                             | -             | <i>Pfam:00664 ABC transporter transmembrane region (...and more)</i>                                                                                                                                                                                                              | n/a          | M          | 14        | 12         | 16         | 11 | 8          | 8          |
| Cre12.g507750.t1.2                             | -             | Protein kinase                                                                                                                                                                                                                                                                    | n/a          | M          | 18        | 29         | 5          | 1  | 15         | 0          |
| Cre07.g350750.t1.1                             | PTOX1         | Alternative oxidase                                                                                                                                                                                                                                                               | C            | O          | 13        | 15         | 23         | 8  | 6          | 0          |
| Cre04.g221050.t1.1                             | -             | <i>Pfam:07059 Protein of unknown function (DUF1336)</i>                                                                                                                                                                                                                           | n/a          | O          | 11        | 11         | 13         | 15 | 2          | 11         |
| Cre12.g558900.t1.1                             | PETO          | Cytochrome b6f complex subunit V                                                                                                                                                                                                                                                  | C            | C          | 31        | 4          | 0          | 24 | 4          | 0          |
| Cre02.g132550.t1.1                             | -             | <i>Pfam:00583 Acetyltransferase (GNAT) family; Panther:13947 N-ACETYLTRANSFERASE CAMELLO; GO:0008080 N-acetyltransferase activity</i>                                                                                                                                             | n/a          | O          | 14        | 16         | 17         | 6  | 1          | 9          |
| DAA00959.1                                     |               | Hypothetical Protein <i>(no conserved domains)</i>                                                                                                                                                                                                                                | n/a          | C.e.       | 26        | 10         | 14         | 5  | 0          | 6          |

| Protein ID<br>(Augustus U10.2)               | Short<br>name | Protein description (JGI3) or conserved domains                                                                                                                                                                                 | Localization |            | Treatment |            |            |    |            |            |
|----------------------------------------------|---------------|---------------------------------------------------------------------------------------------------------------------------------------------------------------------------------------------------------------------------------|--------------|------------|-----------|------------|------------|----|------------|------------|
|                                              |               |                                                                                                                                                                                                                                 | Lit          | Pred       | AN        |            |            | HL |            |            |
|                                              |               |                                                                                                                                                                                                                                 |              |            | WT        | STT7-<br>9 | STT7-<br>1 | WT | STT7-<br>9 | STT7-<br>1 |
| Cre07.g337650.t1.1                           | PDC1          | Mitochondrial pyruvate dehydrogenase complex, E1 component, alpha subunit                                                                                                                                                       | n/a          | M          | 16        | 12         | 4          | 11 | 14         | 4          |
| Cre09.g413650.t1.2                           | -             | Pfam:04437 RINT-1 / TIP-1 family                                                                                                                                                                                                | n/a          | O          | 14        | 10         | 4          | 11 | 3          | 19         |
| Cre01.g057900.t1.1                           | PYK4a         | Pyruvate kinase                                                                                                                                                                                                                 | n/a          | O          | 17        | 8          | 12         | 8  | 6          | 9          |
| Cre12.g560450.t1.2                           | -             | KOG:0978 E3 ubiquitin ligase involved in syntaxin degradation                                                                                                                                                                   | n/a          | O          | 25        | 18         | 11         | 4  | 1          | 1          |
| Cre12.g527050.t1.1                           | -             | Pfam:03765 CRAL/TRIO, N-terminus; Pfam:00650 CRAL/TRIO domain; Panther:23324 SEC14 RELATED PROTEIN; Panther:23324:SF5 SEC14 CYTOSOLIC FACTOR-RELATED; KOG:1471 Phosphatidylinositol transfer protein SEC14 and related proteins | n/a          | O          | 23        | 15         | 11         | 3  | 3          | 4          |
| Cre12.g532100.t1.1                           | -             | (no conserved domains)                                                                                                                                                                                                          | C            | O          | 7         | 8          | 5          | 23 | 11         | 5          |
| Cre17.g701500.t1.1                           | DNJ1          | DnaJlike protein                                                                                                                                                                                                                | n/a          | O          | 10        | 12         | 13         | 4  | 6          | 14         |
| Cre05.g236050.t1.2                           | -             | KOG:4674 Uncharacterized conserved coiled-coil protein                                                                                                                                                                          | n/a          | O          | 4         | 0          | 7          | 0  | 1          | 46         |
| Cre06.g283500.t1.2                           | -             | KOG: 0963 Transcription factor/CCAAT displacement protein CDP1                                                                                                                                                                  | n/a          | O          | 2         | 0          | 5          | 4  | 0          | 47         |
| Cre11.g471250.t1.2                           | -             | Pfam:04857 CAF1 family ribonuclease; Panther:15092 POLY(A)-SPECIFIC RIBONUCLEASE/TARGET OF EGRI, MEMBER 1                                                                                                                       | n/a          | C          | 14        | 11         | 9          | 11 | 5          | 8          |
| Cre17.g715350.t1.1                           | -             | Pfam:01412 Putative GTPase activating protein for Arf                                                                                                                                                                           | n/a          | O          | 23        | 17         | 12         | 0  | 1          | 4          |
| Cre03.g196900.t1.1                           | -             | Predicted protein (Pfam:00635 MSP (Major sperm protein) domain; Panther:10809 VESICLE-ASSOCIATED MEMBRANE PROTEIN (VAMP)                                                                                                        | n/a          | O          | 8         | 12         | 10         | 12 | 14         | 1          |
| Cre03.g201050.t1.1                           | ZNJ2          | DnaJlike Zincfinger protein                                                                                                                                                                                                     | n/a          | C          | 11        | 11         | 10         | 8  | 10         | 7          |
| Cre02.g132800.t1.1                           | PsbO          | Oxygen-evolving enhancer protein 1 of photosystem II                                                                                                                                                                            | n/a          | C          | 12        | 12         | 21         | 4  | 3          | 4          |
| Cre50.g790000.t1.1                           | -             | (no conserved domains)                                                                                                                                                                                                          | n/a          | O          | 0         | 0          | 0          | 22 | 18         | 15         |
| Cre03.g210900.t1.2                           | NAR1.3        | Formate nitrite transporter                                                                                                                                                                                                     | n/a          | C          | 31        | 24         | 0          | 0  | 0          | 0          |
| Cre07.g357157.t1.1                           | -             | Pfam:00067 Cytochrome P450                                                                                                                                                                                                      | n/a          | O          | 6         | 22         | 7          | 5  | 11         | 4          |
| Cre02.g074900.t1.2                           | -             | Pfam:00168 C2 domain; Panther:10774:SF2 CALCIUM LIPID BINDING PROTEIN                                                                                                                                                           | n/a          | M          | 16        | 17         | 5          | 8  | 3          | 6          |
| Cre08.g379900.t1.2                           | -             | Pfam:01544 CorA-like Mg2+ transporter protein (...and more)                                                                                                                                                                     | n/a          | O          | 4         | 10         | 2          | 8  | 18         | 13         |
| 1)Cre03.g164600.t1.1<br>2)Cre03.g165050.t1.1 | 1)PMH1 2)-    | 1) Plasma membrane hydrogen ATPase 2)                                                                                                                                                                                           | n/a<br>(1+2) | 1)O<br>2)O | 22        | 15         | 6          | 7  | 1          | 4          |
| Cre03.g197850.t1.2                           | -             | Pfam:11267 Protein of unknown function (DUF3067)                                                                                                                                                                                | n/a          | M          | 10        | 13         | 7          | 5  | 12         | 8          |
| Cre03.g177500.t1.2                           | -             | Predicted protein (Pfam:03134 TB2/DPI, HVA22 family)                                                                                                                                                                            | n/a          | O          | 13        | 8          | 10         | 12 | 8          | 3          |
| Cre12.g517500.t1.2                           | -             | Hypothetical Protein (Panther:13815:SF4 GOLGIN-84 (...and more))                                                                                                                                                                | n/a          | O          | 16        | 15         | 16         | 1  | 0          | 5          |



| Protein ID<br>(Augustus U10.2) | Short<br>name | Protein description (JGI3) or conserved domains                                                                | Localization |      | Treatment |            |            |    |            |            |
|--------------------------------|---------------|----------------------------------------------------------------------------------------------------------------|--------------|------|-----------|------------|------------|----|------------|------------|
|                                |               |                                                                                                                | Lit          | Pred | AN        |            |            | HL |            |            |
|                                |               |                                                                                                                |              |      | WT        | STT7-<br>9 | STT7-<br>1 | WT | STT7-<br>9 | STT7-<br>1 |
| Cre41.g786900.t1.1             |               | Putative chloroplast lycopene beta cyclase                                                                     | n/a          | C    | 12        | 13         | 27         | 0  | 0          | 0          |
| Cre01.g060900.t1.1             | TEF10a        | Predicted protein                                                                                              | n/a          | C    | 16        | 20         | 2          | 6  | 8          | 0          |
| Cre08.g360600.t1.2             | ERM4          | ERD4related membrane protein                                                                                   | n/a          | SP   | 15        | 15         | 4          | 10 | 6          | 0          |
| Cre12.g547300.t1.2             | -             | <i>Pfam:01061 ABC-2 type transporter; Pfam:00005 ABC transporter</i>                                           | C            | C    | 9         | 21         | 8          | 4  | 7          | 1          |
| Cre17.g724150.t1.1             | DRP3          | Dynamamin-related GTPase                                                                                       | n/a          | O    | 13        | 14         | 8          | 7  | 1          | 7          |
| Cre05.g247450.t1.1             | CGL56         | Putative rhodanese-like protein                                                                                | C            | C    | 8         | 8          | 12         | 9  | 4          | 9          |
| Cre16.g664850.t1.1             | -             | <i>Pfam:00069 Protein kinase domain</i>                                                                        | n/a          | C    | 15        | 13         | 1          | 8  | 6          | 7          |
| Cre02.g082450.t1.1             | -             | <i>(no conserved domains)</i>                                                                                  | n/a          | M    | 10        | 13         | 8          | 11 | 7          | 1          |
| Cre07.g318450.t1.1             | SEC61B        | SEC61beta subunit of ERtranslocon                                                                              | n/a          | C    | 12        | 9          | 10         | 9  | 4          | 6          |
| Cre17.g696250.t1.2             | -             | <i>Pfam:02854 MIF4G domain; Panther:23253 EUKARYOTIC TRANSLATION INITIATION FACTOR 4 GAMMA (...and more)</i>   | n/a          | O    | 4         | 5          | 9          | 2  | 1          | 28         |
| Cre13.g607650.t1.2             | -             | <i>Panther:10891 CALMODULIN</i>                                                                                | n/a          | O    | 0         | 0          | 9          | 4  | 0          | 35         |
| Cre11.g474900.t1.1             | -             | <i>(no conserved domains)</i>                                                                                  | n/a          | C    | 20        | 12         | 1          | 14 | 0          | 1          |
| Cre12.g512400.t1.2             | -             | Nitrogen assimilation regulatory protein                                                                       | n/a          | O    | 15        | 13         | 13         | 4  | 3          | 0          |
| Cre83.g796250.t1.1             | SPT1          | Component of serine palmitoyltransferase                                                                       | n/a          | O    | 24        | 12         | 6          | 2  | 0          | 0          |
| Cre16.g661150.t1.1             | CGL5          | Predicted protein                                                                                              | n/a          | C    | 5         | 13         | 9          | 8  | 9          | 0          |
| Cre16.g672950.t1.1             | LCI2          | Low CO2 inducible gene                                                                                         | n/a          | C    | 2         | 0          | 2          | 25 | 8          | 6          |
| Cre14.g611700.t1.2             | PLAP4         | Plastid lipid associated protein                                                                               | n/a          | C    | 30        | 5          | 3          | 4  | 0          | 0          |
| Cre12.g561550.t1.1             | CDS1          | <i>mitochondrial halfsize ABC transporter, membrane protein</i>                                                | n/a          | SP   | 8         | 7          | 0          | 16 | 11         | 0          |
| Cre14.g608050.t1.2             | -             | <i>predicted protein (Pfam:10351 Golgi-body localisation protein domain)</i>                                   | n/a          | SP   | 11        | 9          | 8          | 8  | 5          | 0          |
| Cre13.g583600.t1.1             | DGD1          | Galactolipid galactosyltransferase                                                                             | n/a          | O    | 15        | 7          | 5          | 7  | 5          | 2          |
| Cre10.g459950.t1.2             | -             | <i>(no conserved domains)</i>                                                                                  | n/a          | O    | 9         | 26         | 3          | 0  | 2          | 0          |
| Cre06.g294700.t1.2             | -             | <i>Pfam:01477 PLAT/LH2 domain; Panther:10877 POLYCYSTIN-RELATED (...and more)</i>                              | n/a          | C    | 1         | 2          | 6          | 0  | 0          | 30         |
| Cre06.g251650.t1.2             | PTC1          | Lowaffinity phosphate transporter                                                                              | C            | O    | 17        | 4          | 4          | 9  | 2          | 2          |
| Cre17.g702950.t1.1             | -             | <i>Pfam:01184 GPR1/FUN34/yaaH family; KEGGORTH:07034 mannosyl-3-phosphoglycerate phosphatase [EC:3.1.3.70]</i> | n/a          | O    | 6         | 6          | 0          | 13 | 13         | 0          |
| Cre07.g318350.t1.1             | CGL64         | <i>Predicted protein (Pfam:12576 Protein of unknown function (DUF3754))</i>                                    | n/a          | O    | 19        | 7          | 0          | 10 | 2          | 0          |
| Cre03.g171850.t1.2             | -             | <i>(no conserved domains)</i>                                                                                  | n/a          | O    | 2         | 0          | 1          | 0  | 0          | 34         |
| Cre03.g162950.t1.1             | -             | <i>(no conserved domains)</i>                                                                                  | n/a          | O    | 6         | 0          | 9          | 1  | 1          | 20         |
| Cre06.g284100.t1.1             | RHP1          | Rh protein, CO <sub>2</sub> responsive                                                                         | n/a          | O    | 6         | 26         | 0          | 0  | 5          | 0          |

| Protein ID<br>(Augustus U10.2) | Short<br>name | Protein description (JGI3) or conserved domains                                                                                                                                                                                                                                                                            | Localization |      | Treatment |            |            |    |            |            |
|--------------------------------|---------------|----------------------------------------------------------------------------------------------------------------------------------------------------------------------------------------------------------------------------------------------------------------------------------------------------------------------------|--------------|------|-----------|------------|------------|----|------------|------------|
|                                |               |                                                                                                                                                                                                                                                                                                                            | Lit          | Pred | AN        |            |            | HL |            |            |
|                                |               |                                                                                                                                                                                                                                                                                                                            |              |      | WT        | STT7-<br>9 | STT7-<br>1 | WT | STT7-<br>9 | STT7-<br>1 |
| Cre10.g444400.t1.2             | -             | <i>Panther:13371 GLYCINE-, GLUTAMATE-, THIENYLCYCLOHEXYLPYPERIDINE-BINDING PROTEIN</i>                                                                                                                                                                                                                                     | n/a          | O    | 6         | 4          | 15         | 3  | 0          | 9          |
| Cre17.g702900.t1.1             | -             | <i>Pfam:01184 GPR1/FUN34/yaaH family; KEGGORTH:07034 mannosyl-3-phosphoglycerate phosphatase [EC:3.1.3.70]; GO:0016020 membrane</i>                                                                                                                                                                                        | n/a          | O    | 0         | 0          | 0          | 18 | 18         | 0          |
| Cre16.g671800.t1.1             | -             | <i>(no conserved domains)</i>                                                                                                                                                                                                                                                                                              | n/a          | C    | 5         | 8          | 9          | 5  | 8          | 0          |
| Cre12.g547550.t1.2             | -             | <i>KOG:1003 Actin filament-coating protein tropomyosin</i>                                                                                                                                                                                                                                                                 | n/a          | M    | 1         | 0          | 3          | 3  | 0          | 27         |
| Cre10.g450850.t1.2             | -             | <i>Pfam:00168 C2 domain</i>                                                                                                                                                                                                                                                                                                | n/a          | O    | 7         | 10         | 4          | 5  | 8          | 0          |
| Cre10.g436100.t1.1             | MLK1          | mixed lineage protein kinase                                                                                                                                                                                                                                                                                               | n/a          | O    | 16        | 9          | 1          | 5  | 2          | 0          |
| Cre03.g189550.t1.2             | ZIP3          | ZIP family transporter                                                                                                                                                                                                                                                                                                     | n/a          | SP   | 6         | 7          | 1          | 12 | 7          | 0          |
| Cre17.g727100.t1.1             | -             | <i>predicted protein (no conserved domains)</i>                                                                                                                                                                                                                                                                            | C            | O    | 10        | 12         | 11         | 0  | 0          | 0          |
| Cre01.g038550.t1.2             | SQD2          | sulfolipid synthase                                                                                                                                                                                                                                                                                                        | n/a          | C    | 9         | 11         | 7          | 5  | 0          | 0          |
| Cre03.g156900.t1.1             | LHCBM5        | chlorophyll ab binding protein of LHCI                                                                                                                                                                                                                                                                                     | n/a          | C    | 18        | 0          | 1          | 13 | 0          | 0          |
| Cre01.g043350.t1.1             | CAO           | Chlorophyll a oxygenase                                                                                                                                                                                                                                                                                                    | n/a          | C    | 11        | 9          | 11         | 0  | 0          | 0          |
| Cre07.g325500.t1.1             | CHLH1         | Magnesium chelatase subunit H                                                                                                                                                                                                                                                                                              | C            | C    | 10        | 16         | 5          | 0  | 0          | 0          |
| Cre10.g460050.t1.2             | -             | <i>FLU chloroplast precursor, alternative spliced version IFLP</i>                                                                                                                                                                                                                                                         | n/a          | C    | 2         | 13         | 14         | 2  | 0          | 0          |
| Cre10.g444450.t1.2             | SSA17         | <i>predicted protein (Pfam:00397 WW domain; Panther:21715 UNCHARACTERIZED; KOG:0977 Nuclear envelope protein lamin, intermediate filament superfamily; GO:0005515 protein binding)</i>                                                                                                                                     | n/a          | O    | 0         | 2          | 7          | 0  | 0          | 21         |
| Cre12.g560950.t1.1             | PSAG          | photosystem I reaction center subunit V                                                                                                                                                                                                                                                                                    | C            | C    | 9         | 0          | 0          | 19 | 0          | 0          |
| Cre06.g282850.t1.2             | -             | <i>(no conserved domains)</i>                                                                                                                                                                                                                                                                                              | n/a          | M    | 1         | 5          | 14         | 0  | 0          | 8          |
| Cre03.g173750.t1.2             | -             | <i>KOG:3544 Collagens (type IV and type XIII), and related proteins</i>                                                                                                                                                                                                                                                    | n/a          | O    | 0         | 0          | 2          | 4  | 3          | 19         |
| Cre03.g161750.t1.1             | -             | <i>(no conserved domains)</i>                                                                                                                                                                                                                                                                                              | n/a          | SP   | 9         | 6          | 11         | 1  | 1          | 0          |
| Cre06.g286550.t1.1             | -             | <i>(no conserved domains)</i>                                                                                                                                                                                                                                                                                              | n/a          | M    | 13        | 9          | 5          | 1  | 0          | 0          |
| Cre10.g466250.t1.1             | -             | <i>Pfam:00400 WD domain, G-beta repeat; Pfam:04192 Utp21 specific WD40 associated putative domain; Panther:13889:SF2 gb def: putative pre-mrna splicing factor [schizosaccharomyces pombe]; Panther:13889 WD40 REPEAT PROTEIN; KOG:1539 WD repeat protein; KEGGORTH:14554 U3 small nucleolar RNA-associated protein 21</i> | n/a          | O    | 14        | 6          | 8          | 0  | 0          | 0          |
| Cre16.g681900.t1.1             | SECY1         | Preprotein translocase secY subunit                                                                                                                                                                                                                                                                                        | C            | C    | 7         | 2          | 3          | 11 | 2          | 2          |

| Protein ID<br>(Augustus U10.2)              | Short name          | Protein description (JGI3) or conserved domains                                                                                                                                                                                                                                                                                                                        | Localization |       | Treatment |        |        |    |        |        |
|---------------------------------------------|---------------------|------------------------------------------------------------------------------------------------------------------------------------------------------------------------------------------------------------------------------------------------------------------------------------------------------------------------------------------------------------------------|--------------|-------|-----------|--------|--------|----|--------|--------|
|                                             |                     |                                                                                                                                                                                                                                                                                                                                                                        | Lit          | Pred  | AN        |        |        | HL |        |        |
|                                             |                     |                                                                                                                                                                                                                                                                                                                                                                        |              |       | WT        | STT7-9 | STT7-1 | WT | STT7-9 | STT7-1 |
| Cre08.g379500.t1.2                          |                     | <i>Pfam:07714</i> Protein tyrosine kinase; <i>Panther:23257:SF347</i> ; <i>Panther:23257</i> SERINE-THREONINE PROTEIN KINASE; <i>KOG:0192</i> Tyrosine kinase specific for activated (GTP-bound) <i>p21cdc42Hs</i> ; <i>GO:0004672</i> protein kinase activity; <i>GO:0006468</i> protein amino acid phosphorylation                                                   | n/a          | O     | 6         | 18     | 2      | 0  | 0      | 1      |
| Cre03.g192050.t1.1                          | FTR1                | Iron permease, membrane protein                                                                                                                                                                                                                                                                                                                                        | n/a          | O     | 14        | 7      | 6      | 0  | 0      | 0      |
| DAA00933.1                                  | CP47                | Photosystem II P680 chlorophyll A apoprotein                                                                                                                                                                                                                                                                                                                           | C            | C.e.  | 10        | 5      | 3      | 6  | 2      | 1      |
| Cre16.g672200.t1.2                          | -                   | (no conserved domains)                                                                                                                                                                                                                                                                                                                                                 | n/a          | C     | 1         | 0      | 2      | 0  | 0      | 23     |
| Cre06.g257300.t1.1                          | -                   | (no conserved domains)                                                                                                                                                                                                                                                                                                                                                 | n/a          | O     | 3         | 0      | 3      | 0  | 0      | 19     |
| Cre12.g525150.t1.1                          | -                   | (no conserved domains)                                                                                                                                                                                                                                                                                                                                                 | n/a          | M     | 9         | 10     | 1      | 2  | 3      | 0      |
| Cre12.g551100.t1.1                          | -                   | <i>Pfam:07172</i> Glycine rich protein family                                                                                                                                                                                                                                                                                                                          | n/a          | O     | 6         | 4      | 2      | 7  | 6      | 0      |
| Cre12.g505950.t1.1                          | -                   | <i>Pfam:03031</i> NLI interacting factor-like phosphatase; <i>Panther:12210:SF3</i> PLASMA MEMBRANE SODIUM RESPONSE PROTEIN; <i>Panther:12210</i> NUCLEAR LIM INTERACTOR-INTERACTING FACTOR-RELATED; <i>KOG:2832</i> TFIIF-interacting CTD phosphatase, including NLI-interacting factor (involved in RNA polymerase II regulation); <i>GO:0005515</i> protein binding | n/a          | M     | 4         | 5      | 5      | 7  | 4      | 0      |
| Cre02.g097800.t1.2                          | HLA3                | ABC transporter                                                                                                                                                                                                                                                                                                                                                        | n/a          | O     | 0         | 0      | 0      | 6  | 6      | 12     |
| Cre11.g479350.t1.2                          | -                   | <i>KOG:4462</i> WASP-interacting protein <i>VRP1/WIP</i> , contains <i>WH2</i> domain                                                                                                                                                                                                                                                                                  | n/a          | O     | 9         | 6      | 7      | 0  | 0      | 2      |
| Cre02.g085257.t1.1                          | COP4                | chlamyopsin 4 lightgated ion channel                                                                                                                                                                                                                                                                                                                                   | n/a          | O     | 3         | 1      | 14     | 0  | 1      | 5      |
| Cre01.g071650.t1.2                          | -                   | Reticulonlike protein                                                                                                                                                                                                                                                                                                                                                  | n/a          | O     | 8         | 8      | 7      | 1  | 0      | 0      |
| Cre03.g205550.t1.2                          | -                   | (no conserved domains)                                                                                                                                                                                                                                                                                                                                                 | n/a          | SP    | 8         | 11     | 4      | 0  | 0      | 0      |
| Cre16.g692300.t1.1                          | -                   | <i>Pfam:00664</i> ABC transporter transmembrane region; <i>Pfam:00005</i> ABC transporter; <i>Panther:24221</i> ; <i>Panther:24221:SF122</i> ; <i>KOG:0058</i> Peptide exporter, ABC superfamily; <i>GO:0055085</i> transmembrane transport                                                                                                                            | n/a          | SP    | 5         | 9      | 3      | 0  | 2      | 3      |
| 1) Cre08.g367500.t1.1 2) Cre08.g365900.t1.1 | 1) LHCSR3 2) LHCSR1 | Stressrelated chlorophyll a/b binding protein 1                                                                                                                                                                                                                                                                                                                        | 1+2)C        | 1+2)C | 0         | 0      | 2      | 11 | 7      | 2      |
| Cre19.g751700.t1.1                          | LHL3                | low molecular mass early lightinduced protein                                                                                                                                                                                                                                                                                                                          | n/a          | C     | 10        | 7      | 4      | 0  | 0      | 1      |

| Protein ID<br>(Augustus U10.2) | Short<br>name | Protein description (JGI3) or conserved domains                                                                                                                                                                                                                                                                    | Localization |      | Treatment |            |            |    |            |            |
|--------------------------------|---------------|--------------------------------------------------------------------------------------------------------------------------------------------------------------------------------------------------------------------------------------------------------------------------------------------------------------------|--------------|------|-----------|------------|------------|----|------------|------------|
|                                |               |                                                                                                                                                                                                                                                                                                                    | Lit          | Pred | AN        |            |            | HL |            |            |
|                                |               |                                                                                                                                                                                                                                                                                                                    |              |      | WT        | STT7-<br>9 | STT7-<br>1 | WT | STT7-<br>9 | STT7-<br>1 |
| Cre24.g769650.t1.2             | -             | hypothetical protein ( <i>Pfam:00999 Sodium/hydrogen exchanger family; Panther:11584:SF4 LIM KINASE-RELATED; Panther:11584 SERINE/THREONINE PROTEIN KINASE; GO:0055085 transmembrane transport; GO:0016021 integral to membrane; GO:0015299 solute:hydrogen antiporter activity; GO:0006812 cation transport</i> ) | n/a          | SP   | 0         | 0          | 0          | 2  | 0          | 19         |
| Cre16.g655750.t1.1             | -             | <i>Tektin, flagellar protein associated with inner arm dynein</i>                                                                                                                                                                                                                                                  | n/a          | O    | 0         | 0          | 0          | 11 | 5          | 5          |
| Cre12.g551250.t1.1             | -             | <i>Pfam:00069 Protein kinase domain</i>                                                                                                                                                                                                                                                                            | n/a          | O    | 0         | 0          | 0          | 6  | 6          | 9          |
| DAA00905.1                     |               | Cytochrome b6/f subunit IV                                                                                                                                                                                                                                                                                         | n/a          | C.e. | 12        | 0          | 0          | 9  | 0          | 0          |
| Cre12.g506650.t1.1             |               | <i>Pfam:07064 RIC1; Panther:22746 FAMILY NOT NAMED; Panther:22746:SF4 SUBFAMILY NOT NAMED</i>                                                                                                                                                                                                                      | n/a          | O    | 8         | 4          | 8          | 0  | 0          | 0          |
| Cre01.g003550.t1.2             | -             | <i>Pfam:00581 Rhodanese-like domain</i>                                                                                                                                                                                                                                                                            | n/a          | C    | 0         | 0          | 1          | 15 | 3          | 1          |
| Cre09.g392850.t1.2             | -             | (no conserved domains)                                                                                                                                                                                                                                                                                             | n/a          |      | 5         | 1          | 3          | 0  | 0          | 11         |
| Cre12.g549350.t1.1             | -             | (no conserved domains)                                                                                                                                                                                                                                                                                             | C            | C    | 8         | 6          | 6          | 0  | 0          | 0          |
| Cre19.g753050.t1.1             | -             | <i>Pfam:00179 Ubiquitin-conjugating enzyme</i>                                                                                                                                                                                                                                                                     | n/a          | O    | 13        | 2          | 2          | 2  | 0          | 0          |
| Cre07.g321000.t1.2             | CYG14         | guanylate cyclase                                                                                                                                                                                                                                                                                                  | n/a          | M    | 12        | 6          | 1          | 0  | 0          | 0          |
| Cre09.g392800.t1.2             | -             | (no conserved domains)                                                                                                                                                                                                                                                                                             | n/a          | O    | 0         | 1          | 5          | 0  | 1          | 12         |
| Cre19.g754700.t1.1             | EGY1          | <i>membrane associated metalloprotease involved in plastid development</i>                                                                                                                                                                                                                                         | n/a          | C    | 2         | 7          | 2          | 2  | 6          | 0          |
| Cre02.g114850.t1.1             | -             | <i>Pfam:00515 Tetratricopeptide repeat; Pfam:01425 Amidase, Panther:22904 CHAPERONE BINDING PROTEIN, KOG:1308 Hsp70-interacting protein Hip/Transient component of progesterone receptor complexes and an Hsp70-binding protein</i>                                                                                | n/a          | M    | 8         | 6          | 5          | 0  | 0          | 0          |
| Cre01.g053450.t1.2             | -             | <i>Pfam:00211 Adenylate and Guanylate cyclase catalytic domain; Panther:16305:SF7; Panther:16305 TESTICULAR SOLUBLE ADENYLYL CYCLASE; GO:0009190 cyclic nucleotide biosynthesis; GO:0016849 phosphorus-oxygen lyase activity; GO:0035556</i>                                                                       | n/a          | O    | 6         | 5          | 1          | 3  | 4          | 0          |
| Cre07.g346050.t1.1             | CRD1          | Copper response defect 1 protein                                                                                                                                                                                                                                                                                   | n/a          | C    | 10        | 9          | 0          | 0  | 0          | 0          |
| Cre02.g073750.t1.1             | KLP1          | Kinesinlike protein                                                                                                                                                                                                                                                                                                | n/a          | O    | 6         | 4          | 6          | 2  | 1          | 0          |
| DAA00906.1                     |               | <i>Lightindependent protochlorophyllide reductase subunit B</i>                                                                                                                                                                                                                                                    | n/a          | C.e. | 6         | 10         | 2          | 0  | 0          | 0          |
| Cre23.g768350.t1.1             | PP2Ab         | <i>Ser/Thr specific protein phosphatase regulatory subunit</i>                                                                                                                                                                                                                                                     | n/a          | O    | 0         | 0          | 0          | 2  | 0          | 16         |
| Cre11.g481450.t1.1             | ATPG          | CF0 ATP synthase subunit II precursor                                                                                                                                                                                                                                                                              | n/a          | C    | 6         | 2          | 0          | 5  | 5          | 0          |
| Cre07.g340200.t1.2             | TEF3          | predicted protein (no conserved domains)                                                                                                                                                                                                                                                                           | C            | C    | 1         | 2          | 1          | 6  | 8          | 0          |
| Cre02.g127450.t1.2             |               | <i>Pfam:08241 Methyltransferase domain</i>                                                                                                                                                                                                                                                                         | n/a          | C    | 1         | 0          | 0          | 9  | 6          | 2          |

| Protein ID<br>(Augustus U10.2) | Short<br>name | Protein description (JGI3) or conserved domains                                                                                                                                                                             | Localization |      | Treatment |            |            |    |            |            |
|--------------------------------|---------------|-----------------------------------------------------------------------------------------------------------------------------------------------------------------------------------------------------------------------------|--------------|------|-----------|------------|------------|----|------------|------------|
|                                |               |                                                                                                                                                                                                                             | Lit          | Pred | AN        |            |            | HL |            |            |
|                                |               |                                                                                                                                                                                                                             |              |      | WT        | STT7-<br>9 | STT7-<br>1 | WT | STT7-<br>9 | STT7-<br>1 |
| Cre17.g702250.t1.2             | TRP4          | Transient receptor potential ion channel protein                                                                                                                                                                            | n/a          | C    | 7         | 7          | 4          | 0  | 0          | 0          |
| Cre32.g781500.t1.2             |               | <i>Pfam:00560 Leucine Rich Repeat;</i><br><i>Panther:23155 LEUCINE-RICH REPEAT-CONTAINING PROTEIN;</i><br><i>GO:0005515 protein binding</i>                                                                                 | n/a          | O    | 5         | 5          | 0          | 4  | 4          | 0          |
| Cre01.g048950.t1.1             | PYR5          | uridine 5' monophosphate synthase                                                                                                                                                                                           | n/a          | C    | 5         | 7          | 5          | 1  | 0          | 0          |
| Cre07.g329050.t1.1             | AOC5          | cationic amino acid transporter                                                                                                                                                                                             | n/a          | O    | 0         | 0          | 1          | 0  | 0          | 16         |
| Cre05.g244050.t1.2             | -             | (no conserved domains)                                                                                                                                                                                                      | n/a          | O    | 0         | 0          | 2          | 1  | 0          | 14         |
| Cre01.g048400.t1.2             | -             | <i>Panther:12042:SF3 ZINC FINGER, C2H2 TYPE CONTAINING PROTEIN-RELATED;</i> <i>Panther:12042 LACTOSYLCERAMIDE 4-ALPHA-GALACTOSYLTRANSFERASE (ALPHA- 1,4-GALACTOSYLTRANSFERASE);</i> <i>KOG:0982 Centrosomal protein Nuf</i> | n/a          |      | 2         | 1          | 9          | 0  | 0          | 5          |
| Cre12.g483650.t1.1             | STL1          | Serine/threonine protein kinase                                                                                                                                                                                             | C            | O    | 10        | 5          | 0          | 1  | 1          | 0          |
| Cre16.g668600.t1.1             | -             | (no conserved domains)                                                                                                                                                                                                      | C            | C    | 0         | 0          | 0          | 11 | 5          | 0          |
| Cre07.g339600.t1.1             | -             | <i>Panther:20932 LOC443603 PROTEIN-RELATED</i>                                                                                                                                                                              | n/a          | O    | 14        | 1          | 1          | 0  | 0          | 0          |
| Cre16.g649100.t1.1             | MAPKKK13      | Mitogen Activated Protein Kinase Kinase Kinase 13                                                                                                                                                                           | n/a          | O    | 7         | 9          | 0          | 0  | 0          | 0          |
| Cre13.g588600.t1.2             | -             | <i>Pfam:00225 Kinesin motor domain (and other kinesin related)</i>                                                                                                                                                          | n/a          | O    | 0         | 0          | 1          | 0  | 0          | 15         |
| Cre10.g428650.t1.1             | CDPKK1        | Calcium/Calmodulin Dependent Protein Kinase Kinase 1                                                                                                                                                                        | n/a          | O    | 3         | 10         | 1          | 1  | 0          | 1          |
| Cre18.g751100.t1.1             | FAP15         | Flagellar Associated Protein                                                                                                                                                                                                | n/a          | O    | 0         | 0          | 0          | 7  | 1          | 8          |
| Cre07.g350050.t1.2             | -             | (no conserved domains)                                                                                                                                                                                                      | n/a          | SP   | 0         | 0          | 0          | 4  | 5          | 7          |
| Cre02.g077550.t1.1             | -             | predicted protein (no conserved domains)                                                                                                                                                                                    | n/a          | SP   | 4         | 9          | 2          | 0  | 0          | 0          |
| Cre02.g086300.t1.2             | -             | (no conserved domains)                                                                                                                                                                                                      | n/a          | C    | 6         | 3          | 5          | 0  | 0          | 0          |
| Cre11.g469150.t1.1             | -             | (no conserved domains)                                                                                                                                                                                                      | C            | C    | 2         | 4          | 8          | 0  | 0          | 0          |
| Cre10.g443000.t1.1             | ATM3          | halfsize ABC transporter, membrane protein                                                                                                                                                                                  | n/a          | SP   | 0         | 0          | 0          | 0  | 0          | 13         |
| Cre17.g734250.t1.2             | -             | <i>Pfam:00069 Protein kinase domain;</i> <i>Pfam:07714 Protein tyrosine kinase</i>                                                                                                                                          | n/a          | O    | 5         | 8          | 0          | 0  | 0          | 0          |
| Cre05.g245550.t1.2             | PIK1          | Phosphatidylinositol 4kinase                                                                                                                                                                                                | n/a          | O    | 0         | 0          | 1          | 0  | 1          | 11         |
| Cre06.g303850.t1.2             |               | TBC1 domain protein                                                                                                                                                                                                         | n/a          | M    | 5         | 4          | 0          | 3  | 1          | 0          |
| Cre11.g480200.t1.2             | -             | (no conserved domains)                                                                                                                                                                                                      | n/a          | O    | 0         | 0          | 1          | 1  | 0          | 10         |
| Cre10.g452800.t1.1             | LCIB          | lowCO2inducible protein                                                                                                                                                                                                     | C            | C    | 0         | 0          | 0          | 6  | 6          | 0          |
| Cre03.g178000.t1.1             | -             | (no conserved domains)                                                                                                                                                                                                      | n/a          | O    | 0         | 0          | 0          | 0  | 0          | 12         |
| Cre01.g043050.t1.1             | -             | <i>Pfam:09335 SNARE associated Golgi protein;</i> <i>Panther:12677 UNCHARACTERIZED</i>                                                                                                                                      | n/a          | M    | 0         | 0          | 6          | 0  | 1          | 5          |

| Protein ID<br>(Augustus U10.2) | Short<br>name | Protein description (JGI3) or conserved domains                                                                                                                                               | Localization |      | Treatment |            |            |    |            |            |
|--------------------------------|---------------|-----------------------------------------------------------------------------------------------------------------------------------------------------------------------------------------------|--------------|------|-----------|------------|------------|----|------------|------------|
|                                |               |                                                                                                                                                                                               | Lit          | Pred | AN        |            |            | HL |            |            |
|                                |               |                                                                                                                                                                                               |              |      | WT        | STT7-<br>9 | STT7-<br>1 | WT | STT7-<br>9 | STT7-<br>1 |
| Cre26.g773750.t1.2             | -             | <i>Pfam:00069 Protein kinase domain; Panther:23257 SERINE-THREONINE PROTEIN KINASE; KOG:0192 Tyrosine kinase specific for activated (GTP-bound) p21cdc42Hs</i>                                | n/a          | M    | 2         | 7          | 3          | 0  | 0          | 0          |
| Cre13.g598900.t1.1             | LHCA1         | Lightharvesting protein of photosystem I                                                                                                                                                      | 1+2)<br>n/a  | C    | 2         | 4          | 6          | 0  | 0          | 0          |
| Cre16.g661950.t1.1             | -             | (no conserved domains)                                                                                                                                                                        | n/a          | O    | 0         | 0          | 4          | 0  | 0          | 7          |
| Cre11.g468400.t1.2             | -             | <i>Pfam:07466 Protein of unknown function (DUF1517)</i>                                                                                                                                       | n/a          | C    | 5         | 3          | 0          | 3  | 0          | 0          |
| Cre04.g227350.t1.2             | CCR4          | Notcomplex component                                                                                                                                                                          | n/a          | O    | 0         | 0          | 0          | 0  | 0          | 11         |
| Cre12.g518650.t1.1             | BHSD1         | Steroid dehydrogenase                                                                                                                                                                         | n/a          | O    | 3         | 4          | 4          | 0  | 0          | 0          |
| Cre05.g242000.t1.1             | CHLD          | Magnesium chelatase subunit D                                                                                                                                                                 | n/a          | C    | 2         | 4          | 5          | 0  | 0          | 0          |
| Cre07.g345350.t1.2             | -             | <i>Pfam:00249 Myb-like DNA-binding domain</i>                                                                                                                                                 | n/a          | O    | 0         | 0          | 0          | 0  | 0          | 10         |
| Cre01.g070900.t1.1             | -             | (no conserved domains)                                                                                                                                                                        | n/a          | M    | 0         | 0          | 1          | 0  | 0          | 9          |
| Cre01.g024950.t1.1             | -             | <i>Panther:12444 Uncharacterized</i>                                                                                                                                                          | n/a          | O    | 3         | 6          | 1          | 0  | 0          | 0          |
| Cre05.g234100.t1.1             | CYP745A1      | cytochrome P450                                                                                                                                                                               | n/a          | SP   | 5         | 4          | 1          | 0  | 0          | 0          |
| Cre06.g255950.t1.2             | -             | WD40 repeat protein                                                                                                                                                                           | n/a          | O    | 8         | 2          | 0          | 0  | 0          | 0          |
| Cre15.g645950.t1.1             | CYP97A5       | <i>Cytochrome P450. CYP97A3 of Arabidopsis is a carotenoid betaring hydroxylase [PMID: 16492736]. CYP97C1 of Arabidopsis (LUT1) is a carotenoid epsilon ring hydroxylase [PMID: 14709673]</i> | n/a          | C    | 5         | 4          | 1          | 0  | 0          | 0          |

## References

- Tardif, M., Atteia, A., Specht, M., Cogne, G., Rolland, N., Brugiere, S., Hippler, M., Ferro, M., Bruley, C., Peltier, G., Vallon, O., and Cournac, L. (2012). PredAlgo: a new subcellular localization prediction tool dedicated to green algae. *Molecular biology and evolution* **29**, 3625-3639.
- Terashima, M., Specht, M., and Hippler, M. (2011). The chloroplast proteome: a survey from the *Chlamydomonas reinhardtii* perspective with a focus on distinctive features. *Current genetics* **57**, 151-168.

**Supplemental Table 2:** Provided seperately as compressed file

**Supplemental Table 3: Representative phosphopeptides derived from photosynthetic complexes and other proteins relevant to the manuscript.**

Peptides quantified by pyQMS are highlighted in bold. Subscripts denote the position of phosphorylation sites within the polypeptide sequences. Ambiguous phosphorylation sites (PhosphoRS site probabilities <95%) are indicated by italic letters. Phosphorylation sites with probabilities < 5 % are not annotated. Site probabilities are presented for every possible acceptor with numbers given in brackets indicating their positions within respective peptides. #P, number of phosphorylations.

| Protein        | Peptide                                                                      | #<br>P | Peptide<br>Score | PhosphoRS                                                     |
|----------------|------------------------------------------------------------------------------|--------|------------------|---------------------------------------------------------------|
|                |                                                                              |        |                  | Site Probabilities                                            |
| PSAG           | EANFDS <sub>65</sub> T <sub>66</sub> VGPK                                    | 1      | 121.058711       | S(6): 94.0; T(7): 6.0                                         |
|                | EANFDST <sub>66</sub> VGPK                                                   | 1      | 115.722028       | S(6): 0.5; T(7): 99.5                                         |
|                | EANFDS <sub>65</sub> T <sub>66</sub> VGPK                                    | 2      | 92.9285023       | S(6): 100.0; T(7): 100.0                                      |
|                | T <sub>71</sub> T <sub>72</sub> GATYFDDLQK                                   | 1      | 148.237485       | T(1): 5.0; T(2): 95.0; T(5): 0.0; Y(6): 0.0                   |
| PSAH           | <b>YFDLQDM(ox)ENT<sub>47</sub>T<sub>48</sub>GS<sub>50</sub>WDM(ox)YGVDEK</b> | 1      | 127.592236       | Y(1): 0.0; T(10): 8.7; T(11): 82.5; S(13): 8.7; Y(17): 0.0    |
|                | YFDLQDMEN <sub>47</sub> T <sub>48</sub> GS <sub>50</sub> WDMYGVDEK           | 1      | 254.909514       | Y(1): 0.0; T(10): 0.0; T(11): 0.0; S(13): 100.0; Y(17): 0.0   |
|                | YFDLQDMEN <sub>47</sub> T <sub>48</sub> GS <sub>50</sub> WDMYGVDEK           | 2      | 123.392283       | Y(1): 0.0; T(10): 99.9; T(11): 90.5; S(13): 9.6; Y(17): 0.0   |
|                | YFDLQDMEN <sub>48</sub> GS <sub>50</sub> WDMYGVDEK                           | 2      | 215.596742       | Y(1): 0.0; T(10): 0.1; T(11): 100.0; S(13): 100.0; Y(17): 0.0 |
| PSBB<br>(CP47) | LGD <sub>503</sub> TSS <sub>503</sub> LREAF                                  | 1      | 160.650097       | T(4): 0.0; S(5): 0.0; S(6): 100.0                             |
| PSBC<br>(CP43) | <b>Ac-T<sub>3</sub>LFNGTLTVGGR</b>                                           | 1      | 109.558396       | T(1): 100.0; T(6): 0.0; T(8): 0.0                             |
|                | Ac-T <sub>3</sub> LFNGT <sub>8</sub> LTVGGR                                  | 2      | 93.2852333       | T(1): 100.0; T(6): 99.9; T(8): 0.1                            |
|                | <b>GIDRFDEPVLS<sub>456</sub>MRPLD</b>                                        | 1      | 218.012454       | S(11): 100.0                                                  |
|                | <b>GIDRFDEPVLS<sub>456</sub>M(ox)RPLD</b>                                    | 1      | 271.487046       | S(11): 100.0                                                  |
| PSBD<br>(D2)   | <b>T<sub>2</sub>IAIGTYQEK</b>                                                | 1      | 145.509962       | T(1): 100.0; T(6): 0.0; Y(7): 0.0                             |
|                | Ac-T <sub>2</sub> IAIGTYQEK                                                  | 1      | 106.207208       | T(1): 100.0; T(6): 0.0; Y(7): 0.0                             |
|                | Ac-T <sub>2</sub> IAIGTYQEK <sub>R</sub>                                     | 1      | 151.864527       | T(1): 100.0; T(6): 0.0; Y(7): 0.0                             |
| PSBO           | <b>LT<sub>Y</sub>TLDAM(ox)SGS<sub>138</sub>FK</b>                            | 1      | 176.240501       | T(2): 0.0; Y(3): 0.0; T(4): 0.0; S(9): 0.0; S(11): 100.0      |
|                | <b>VGS<sub>143</sub>DGSAELKEDDGIDYAAATT<sub>V</sub>QLP<sub>G</sub>GER</b>    | 1      | 206.182797       | S(3): 100.0; S(6): 0.0; Y(17): 0.0; T(20): 0.0; T(21): 0.0    |
| PSBR           | <b>T<sub>37</sub>DIT<sub>37</sub>KVGLNSIEDPVVK</b>                           | 1      | 192.884307       | T(1): 94.5; T(4): 5.5; S(10): 0.0                             |
|                | <b>TDITKVGLNS<sub>40</sub>IEDPVVK</b>                                        | 1      | 209.641177       | T(1): 0.0; T(4): 0.0; S(10): 100.0                            |
|                | <b>VGLNS<sub>40</sub>IEDPVVK</b>                                             | 1      | 157.800229       | S(5): 100.0                                                   |
|                | <b>VGLNS<sub>40</sub>IEDPVVKQNL<sub>M</sub>MGK</b>                           | 1      | 241.265723       | S(5): 100.0                                                   |
|                | <b>VGLNS<sub>40</sub>IEDPVVKQNL<sub>M</sub>(ox)GK</b>                        | 1      | 205.191116       | S(5): 100.0                                                   |



|                                  |                                                                                                                             |   |             |                                                                                                                                               |
|----------------------------------|-----------------------------------------------------------------------------------------------------------------------------|---|-------------|-----------------------------------------------------------------------------------------------------------------------------------------------|
|                                  | <i>T</i> <sub>489</sub> <i>AS</i> <sub>497</sub> <i>LQHS</i> <sub>495</sub> <i>LGSFEATVSTAAAATSTALTAAGK</i>                 | 1 | 99.5789068  | T(1): 71.0; S(3): 13.1; S(7): 13.1; S(9): 2.5; S(11): 0.1; T(15): 0.1; S(17): 0.0; T(18): 0.0; T(23): 0.0; S(24): 0.0; T(25): 0.0; T(28): 0.0 |
| STT7                             | <b>DAGLAS</b> <sub>533</sub> <b>MEEAILK</b>                                                                                 | 1 | 209.096439  | S(6): 100.0                                                                                                                                   |
|                                  | <b>DAGLAS</b> <sub>533</sub> <b>M(ox)EEAILK</b>                                                                             | 1 | 197.119206  | S(6): 100.0                                                                                                                                   |
|                                  | <i>EGSQ</i> <sub>571</sub> <i>IAWWQER</i>                                                                                   | 1 | 137.095954  | S(3): 0.0; T(5): 100.0                                                                                                                        |
| STL1                             | <b>LQADDQGV</b> <sub>126</sub> <b>QR</b>                                                                                    | 1 | 73.3515186  | T(21): 97.3; S(23): 2.7                                                                                                                       |
|                                  | <b>SSGGS</b> <sub>426</sub> <b>IDLTPAAAAASNR</b>                                                                            | 1 | 157.630963  | S(1): 0.1; S(2): 0.1; S(5): 99.8; T(9): 0.1; S(16): 0.0                                                                                       |
| Cre01.g0714<br>50.t1.2<br>(STN8) | <i>S</i> <sub>422</sub> <i>S</i> <sub>423</sub> <i>GGG</i> <sub>426</sub> <i>IDLTPAAAAASNR</i>                              | 2 | 127.685977  | S(1): 50.0; S(2): 50.0; S(5): 100.0; T(9): 0.0; S(16): 0.0                                                                                    |
|                                  | <b>RQPS</b> <sub>753</sub> <b>ATPEQVQAQAAAAQQQAAPQR</b>                                                                     | 1 | 203.063475  | S(4): 0.9; T(6): 99.1                                                                                                                         |
|                                  | <b>AGS</b> <sub>814</sub> <b>SSQSAAPQQQMPR</b>                                                                              | 1 | 169.538124  | S(3): 99.6; S(4): 0.4; S(5): 0.0; S(7): 0.0                                                                                                   |
| PGRL1                            | <i>KDDGYIS</i> <sub>50</sub> <i>EDEGLGNVAADYCAIDGAGK</i>                                                                    | 1 | 148.687556  | T(9): 100.0                                                                                                                                   |
| LHCSR3                           | <i>S</i> <sub>26</sub> <i>VS</i> <sub>28</sub> <i>GRRTTAAEPQTAAPVAAEDVFAYTK</i>                                             | 1 | 254.906376  | S(1): 50.0; S(3): 50.0; T(7): 0.0; T(8): 0.0; T(14): 0.0; Y(26): 0.0; T(27): 0.0                                                              |
|                                  | <b>S</b> <sub>26</sub> <b>VS</b> <sub>28</sub> <b>GRRTTAAEPQTAAPVAAEDVFAYTK</b>                                             | 2 | 270.541763  | S(1): 99.0; S(3): 99.0; T(7): 1.0; T(8): 1.0; T(14): 0.0; Y(26): 0.0; T(27): 0.0                                                              |
|                                  | <i>S</i> <sub>26</sub> <i>VS</i> <sub>28</sub> <i>GRRTT</i> <sub>33</sub> <i>AAEPQTAAPVAAEDVFAYTK</i>                       | 2 | 227.116185  | S(1): 49.8; S(3): 49.8; T(7): 1.2; T(8): 99.2; T(14): 0.0; Y(26): 0.0; T(27): 0.0                                                             |
|                                  | <i>S</i> <sub>26</sub> <i>VS</i> <sub>28</sub> <i>GRRT</i> <sub>32</sub> <i>T</i> <sub>33</sub> <i>AAEPQTAAPVAAEDVFAYTK</i> | 3 | 225.242936  | S(1): 50.2; S(3): 50.2; T(7): 99.6; T(8): 100.0; T(14): 0.0; Y(26): 0.0; T(27): 0.0                                                           |
|                                  | <b>T</b> <sub>32</sub> <b>T</b> <sub>33</sub> <b>AAEPQTAAPVAAEDVFAYTK</b>                                                   | 1 | 182.489305  | T(1): 6.8; T(2): 92.6; T(8): 0.5; Y(20): 0.0; T(21): 0.0                                                                                      |
|                                  | <b>RT</b> <sub>32</sub> <b>T</b> <sub>33</sub> <b>AAEPQTAAPVAAEDVFAYTK</b>                                                  | 1 | 213.488758  | T(2): 93.5; T(3): 6.5; T(9): 0.0; Y(21): 0.0; T(22): 0.0                                                                                      |
|                                  | <b>RT</b> <sub>32</sub> <b>T</b> <sub>33</sub> <b>AAEPQT</b> <sub>39</sub> <b>AAPVAAEDVFAYTK</b>                            | 2 | 229.517291  | T(2): 93.7; T(3): 6.3; T(9): 100.0; Y(21): 0.0; T(22): 0.0                                                                                    |
|                                  | <b>RT</b> <sub>32</sub> <b>T</b> <sub>33</sub> <b>AAEPQTAAPVAAEDVFAYTK</b>                                                  | 2 | 252.243546  | T(2): 100.0; T(3): 100.0; T(9): 0.0; Y(21): 0.0; T(22): 0.0                                                                                   |
|                                  | <i>EAI</i> <sub>LE</sub> <i>LD</i> <sub>DI</sub> <i>ERDLGLPVTPLPDNLKS</i> <sub>258</sub> <i>L</i>                           | 1 | 215.522415  | T(18): 0.0; S(26): 100.0                                                                                                                      |
|                                  | <b>DLGLPVTPLPDNLKS</b> <sub>258</sub> <b>L</b>                                                                              | 1 | 221.09868   | T(7): 0.0; S(15): 100.0                                                                                                                       |
|                                  | <i>DLGLPVT</i> <sub>250</sub> <i>PLPDNLKS</i> <sub>258</sub> <i>L</i>                                                       | 2 | 121.2829635 | T(7): 100.0; S(15): 100.0                                                                                                                     |
| LHCA6                            | <b>KPGS</b> <sub>137</sub> <b>VDQDPIFSQYK</b>                                                                               | 1 | 151.029756  | S(4): 100.0; S(12): 0.0; Y(14): 0.0                                                                                                           |
| LHCB4                            | <i>Ac-VFKFPT</i> <sub>7</sub> <i>PPGTQK</i>                                                                                 | 1 | 77.0006581  | T(6):100.0;T(10):0.0                                                                                                                          |
|                                  | <i>Ac-VFKFPT</i> <sub>11</sub> <i>PPGT</i> <sub>11</sub> <i>QK</i>                                                          | 1 | 74.4817163  | T(6):0.0;T(10):100.0                                                                                                                          |
|                                  | <i>Ac-VFKFPT</i> <sub>7</sub> <i>PPGT</i> <sub>11</sub> <i>QK</i>                                                           | 2 | 82.4913734  | T(6):100.0;T(10):100.0                                                                                                                        |
|                                  | <i>FPT</i> <sub>11</sub> <i>PPGT</i> <sub>11</sub> <i>QK</i>                                                                | 1 | 170.7701    | T(3):0.0;T(7):100.0                                                                                                                           |
|                                  | <i>FPT</i> <sub>7</sub> <i>PPGTQK</i>                                                                                       | 1 | 134.146695  | T(3):100.0;T(7):0.0                                                                                                                           |
|                                  | <i>FPT</i> <sub>7</sub> <i>PPGT</i> <sub>11</sub> <i>QK</i>                                                                 | 2 | 146.61926   | T(3): 100.0; T(7): 100.0                                                                                                                      |
|                                  | <i>AGT</i> <sub>17</sub> <i>TATKPAPK</i>                                                                                    | 1 | 132.887942  | T(3):100.0;T(4):0.0;T(6):0.0                                                                                                                  |
|                                  | <i>AGT</i> <sub>17</sub> <i>T</i> <sub>18</sub> <i>ATKPAPK</i>                                                              | 2 | 64.8200002  | T(3):99.8;T(4):98.6;T(6):1.6                                                                                                                  |
|                                  | <i>AT</i> <sub>27</sub> <i>T</i> <sub>28</sub> <i>KKVATSTGTR</i>                                                            | 2 | 112.125371  | T(2): 100.0; T(3): 100.0; T(8): 0.0; S(9): 0.0; T(10): 0.0; T(12): 0.0                                                                        |
|                                  | <i>KVATS</i> <sub>35</sub> <i>T</i> <sub>36</sub> <i>GTRSGGVGYR</i>                                                         | 2 | 104.915493  | T(4): 1.0; S(5): 98.3; T(6): 91.7; T(8): 9.0; S(10): 0.0; Y(15): 0.0                                                                          |
|                                  | <i>VATS</i> <sub>35</sub> <i>TGT</i> <sub>38</sub> <i>RSGGVGYR</i>                                                          | 2 | 148.307042  | T(3):0.5;S(4):99.1;T(5):0.5;T(7):99.5;S(9):0.5;Y(14):0.0                                                                                      |
|                                  | <i>VAT</i> <sub>34</sub> <i>ST</i> <sub>36</sub> <i>GT</i> <sub>38</sub> <i>RSGGVGYR</i>                                    | 2 | 151.074686  | T(3): 99.5; S(4): 0.5; T(5): 6.4; T(7): 93.5; S(9): 0.0; Y(14): 0.0                                                                           |
|                                  | <b>Gs</b> <sub>103</sub> <b>VEAIVQATPDEVSSENR</b>                                                                           | 1 | 177.527749  | S(2): 100.0; T(10): 0.0; S(15): 0.0; S(16): 0.0                                                                                               |
|                                  | <b>GS</b> <sub>103</sub> <b>VEAIVQATPDEVS</b> <sub>116</sub> <b>SEN</b>                                                     | 1 | 147.370844  | S(2):0.0;T(10):0.0;S(15):99.5;S(16):0.5                                                                                                       |

|                                  |                                                                                 |   |            |                                                                                                             |
|----------------------------------|---------------------------------------------------------------------------------|---|------------|-------------------------------------------------------------------------------------------------------------|
|                                  | <b>NNKGS<sub>103</sub>VEAIVQATPDEVSSSEN</b>                                     | 1 | 285.651331 | S(5):100.0;T(13):0.0;S(18):0.0;S(19):0.0                                                                    |
|                                  | NNKGS <sub>103</sub> VEAIVQATPDEV <sub>S116</sub> <sub>S117</sub> ENR           | 1 | 213.018701 | S(5): 100.0; T(13): 0.0; S(18): 93.6; S(19): 6.4                                                            |
| Lhcbm5                           | <b>AAPASAQKKT<sub>33</sub>IR</b>                                                | 2 | 178.131485 | S(5): 0.0; T(10): 100.0                                                                                     |
|                                  | KAEVVES <sub>107</sub> <sub>T108</sub> <sub>S109</sub> GGLDPR                   | 1 | 166.048475 | S(7): 33.3; T(8): 33.3; S(9): 33.3                                                                          |
|                                  | IDGS <sub>139</sub> FNDWFM(ox)EAVVR                                             | 1 | 130.074065 | S(4): 100.0                                                                                                 |
|                                  | <b>DSNNYAGYEAT<sub>161</sub>LKSENGVTFPK</b>                                     | 1 | 217.76082  | S(2): 0.0; Y(5): 0.0; Y(8): 0.0; T(11): 100.0; S(14): 0.0; T(19): 0.0                                       |
|                                  | <b>DSNNYAGYEATLKS<sub>164</sub>ENGVTFPK</b>                                     | 1 | 247.254223 | S(2): 0.0; Y(5): 0.0; Y(8): 0.0; T(11): 0.0; S(14): 100.0; T(19): 0.0                                       |
| PetO                             | DSNNYAGYEAT <sub>161</sub> LKS <sub>164</sub> ENGVTFPK                          | 2 | 176.332496 | S(2): 0.0; Y(5): 0.0; Y(8): 0.0; T(11): 100.0; S(14): 100.0; T(19): 0.0                                     |
|                                  | SENGVT <sub>169</sub> FPK                                                       | 1 | 105.89249  | S(1): 0.0; T(6): 100.0                                                                                      |
|                                  | AATGS <sub>187</sub> KKGGFPFGGK                                                 | 1 | 95.2531449 | T(3): 0.0; S(5): 100.0                                                                                      |
|                                  | AAT <sub>185</sub> GS <sub>187</sub> KKGGFPFGGK                                 | 2 | 116.605432 | T(3): 100.0; S(5): 100.0                                                                                    |
| Cytb6f-IV                        | <b>SVT<sub>4</sub>KKPDLSDPVLK</b>                                               | 1 | 160.98424  | S(1): 0.3; T(3): 99.7; S(9): 0.0                                                                            |
|                                  | TLEGLDALLGIDPNDPKAGT <sub>71</sub> GSSASTK                                      | 1 | 176.091281 | T(1): 0.0; T(20): 97.9; S(22): 1.0; S(23): 1.0; S(25): 0.1; T(26): 0.0                                      |
| TEF23<br>(EGY1)                  | <b>S<sub>79</sub>ATAVAESVSSDAAR</b>                                             | 1 | 118.678653 | S(1): 99.2; T(3): 0.8; S(8): 0.0; S(10): 0.0; S(11): 0.0                                                    |
|                                  | <b>SATAVAES<sub>86</sub>VSSDAAR</b>                                             | 1 | 170.883664 | S(1): 0.0; T(3): 0.0; S(8): 99.7; S(10): 0.3; S(11): 0.0                                                    |
|                                  | TGG <sub>812</sub> VDQLLEEVTRR                                                  | 1 | 89.5860978 | T(1): 0.0; S(4): 100.0; T(13): 0.0                                                                          |
| TEF1                             | <b>HALGLTEAEASEIAVTAS<sub>995</sub>LDEAAGGPK</b>                                | 1 | 203.909006 | T(6): 0.0; S(11): 0.0; T(16): 0.0; S(18): 100.0                                                             |
| TEF10a                           | QGS <sub>55</sub> MPNQMEMVR                                                     | 1 | 135.992544 | S(3): 100.0                                                                                                 |
|                                  | <b>S<sub>483</sub>HHNQSVSVGQLNPIR</b>                                           | 1 | 186.107204 | S(1): 99.6; S(6): 0.4; S(8): 0.0                                                                            |
|                                  | <b>SHHNQS<sub>488</sub>VSVGQLNPIR</b>                                           | 1 | 141.380957 | S(1): 0.5; S(6): 99.5; S(8): 0.0                                                                            |
|                                  | <b>SHHNQS<sub>488</sub>VS<sub>490</sub>VGQLNPIR</b>                             | 2 | 160.23552  | S(1): 0.0; S(6): 100.0; S(8): 100.0                                                                         |
|                                  | <b>SHHNQS<sub>490</sub>VGQLNPIR</b>                                             | 1 | 209.083848 | S(1): 0.0; S(6): 0.0; S(8): 100.0                                                                           |
|                                  | TDGGATAEQPMAATYGS <sub>339</sub> FR                                             | 1 | 180.821621 | T(1):0.0;T(6):0.0;T(15):0.0;Y(16):0.0;S(18):100.0                                                           |
|                                  | <i>T</i> <sub>342</sub> <i>NS</i> <sub>344</sub> GVNGEAEDSNAFASVASHGLQIGENQDSGR | 1 | 89.9056245 | T(1):84.9;S(3):15.1;S(12):0.0;S(17):0.0;S(20):0.0;S(31):0.0                                                 |
|                                  | <b>QGD<sub>T610</sub>AS<sub>612</sub>S<sub>613</sub>AVLDQAVEIEADTR</b>          | 2 | 122.575676 | T(4):91.1;S(6):99.1;S(7):9.8;T(20):0.0                                                                      |
| Cre09.g3984<br>00.t1.1<br>(TRP5) | ADLDRTS <sub>640</sub> RPLS <sub>644</sub> VPNMPENLR                            | 2 | 160.482517 | T(6):0.8;S(7):99.2;S(11):100.0                                                                              |
|                                  | ADLDRTS <sub>640</sub> RPLSVPNMPENLR                                            | 1 | 79.9466685 | T(6):2.0;S(7):95.9;S(11):2.0                                                                                |
|                                  | TSRPLS <sub>644</sub> VPNMPENLR                                                 | 1 | 176.396511 | T(1):0.0;S(2):0.0;S(6):100.0                                                                                |
|                                  | <b>ADQVS<sub>1058</sub>IGLAS<sub>1063</sub>DDESNPILQHPR</b>                     | 2 | 220.305797 | S(5):100.0;S(10):100.0;S(14):0.0                                                                            |
|                                  | ADQVSI <sub>1063</sub> GLAS <sub>1063</sub> DDESNPILQHPR                        | 1 | 229.866278 | S(5):0.0;S(10):100.0;S(14):0.0                                                                              |
|                                  | <b>EYREDTGEVTAPGAS<sub>57</sub>QTTR</b>                                         | 1 | 161.549477 | Y(2):0.0;T(6):0.0;T(10):0.0;S(15):99.9;T(17):0.1;T(18):0.1                                                  |
|                                  | <b>EYREDTGEVTAPGAS<sub>57</sub>TR</b>                                           | 1 | 156.844873 | Y(2):0.0;T(6):0.0;T(10):0.0;S(15):0.7;T(17):99.3;T(18):0.1                                                  |
| LCI2                             | EYREDTGEVTAPGAS <sub>57</sub> T <sub>60</sub> RR                                | 2 | 93.0978002 | Y(2):0.0;T(6):0.0;T(10):0.0;S(15):0.4;T(17):99.8;T(18):99.8                                                 |
|                                  | RES <sub>64</sub> DGLYVNADGPRPVPR                                               | 1 | 107.791414 | S(3):100.0;Y(7):0.0                                                                                         |
|                                  | APAT <sub>325</sub> AGSSTPIVKPK                                                 | 1 | 109.003645 | T(4): 100.0; S(7): 0.0; S(8): 0.0; T(9): 0.0                                                                |
| ALB3                             | RNDGEEVEDVEVEVSSGSSSSSGSNGAS <sub>384</sub> GR                                  | 1 | 233.551481 | S(17): 0.0; S(18): 0.0; S(20): 0.0; S(21): 0.0; S(22): 0.0; S(23): 0.0; S(24): 0.0; S(26): 0.1; S(30): 99.9 |

|                                       |                                                                                              |   |            |                                                                                                                      |
|---------------------------------------|----------------------------------------------------------------------------------------------|---|------------|----------------------------------------------------------------------------------------------------------------------|
|                                       | <b>AASTVSAGAGGS<sub>414</sub>EEGKDNSA</b>                                                    | 1 | 207.799917 | S(3): 0.0; T(4): 0.0; S(6): 0.0; S(12): 100.0; S(19): 0.0                                                            |
|                                       | <b>KTAASSTPSTPGGS<sub>63</sub>PPGTASSRPPPPPR</b>                                             | 1 | 189.470532 | T(2): 0.0; S(5): 0.0; S(6): 0.0; T(7): 0.0; S(9): 0.0; T(10): 0.0; S(14): 100.0; T(18): 0.0; S(20): 0.0; S(21): 0.0  |
|                                       | KTAASSTPSTPGGS <sub>63</sub> PPGT <sub>67</sub> ASSRPPPPPR                                   | 2 | 147.246889 | T(2): 0.0; S(5): 0.0; S(6): 0.0; T(7): 0.0; S(9): 0.2; T(10): 0.2; S(14): 99.6; T(18): 99.8; S(20): 0.2; S(21): 0.0  |
|                                       | <b>KTAASSTPSTPGGSPPGT<sub>67</sub>ASSRPPPPPR</b>                                             | 1 | 195.195174 | T(2): 0.0; S(5): 0.0; S(6): 0.0; T(7): 0.0; S(9): 0.0; T(10): 0.0; S(14): 0.0; T(18): 100.0; S(20): 0.0; S(21): 0.0  |
| Cre12.g5407<br>00.t1.2                | <b>TAASSTPSTPGGS<sub>63</sub>PPGTASSRPPPPPR</b>                                              | 1 | 153.717857 | T(1): 0.0; S(4): 0.0; S(5): 0.0; T(6): 0.0; S(8): 0.0; T(9): 0.1; S(13): 99.8; T(17): 0.0; S(19): 0.0; S(20): 0.0    |
|                                       | <b>TAASSTPSTPGGS<sub>63</sub>PPGT<sub>67</sub>ASSRPPPPPR</b>                                 | 2 | 153.382944 | T(1): 0.0; S(4): 0.0; S(5): 0.0; T(6): 0.0; S(8): 0.0; T(9): 0.2; S(13): 99.8; T(17): 99.8; S(19): 0.2; S(20): 0.0   |
|                                       | <b>TAASSTPS<sub>58</sub>T<sub>59</sub>PGGSPPGT<sub>67</sub>ASSRPPPPPR</b>                    | 3 | 174.66505  | T(1): 0.0; S(4): 0.0; S(5): 0.0; T(6): 0.2; S(8): 98.8; T(9): 98.8; S(13): 2.1; T(17): 100.0; S(19): 0.0; S(20): 0.0 |
| Cre17.g7241<br>50                     | <b>ALDGASSLDDVLLGTGS<sub>597</sub>R</b>                                                      | 1 | 235.317382 | S(6): 0.0; S(7): 0.0; T(15): 0.0; S(17): 100.0                                                                       |
|                                       | ALDGASS <sub>587</sub> LDDVLLGTGS <sub>597</sub> R                                           | 2 | 197.994692 | S(6): 0.0; S(7): 100.0; T(15): 0.0; S(17): 100.0                                                                     |
|                                       | VSLDQTPDS <sub>219</sub> PLGSVNSIDQLLGTVDSEETIGDK                                            | 1 | 185.449621 | S(2): 0.0; T(6): 0.0; S(9): 99.8; S(13): 0.2; S(16): 0.0; T(23): 0.0; S(25): 0.0; S(27): 0.0; T(30): 0.0             |
| Cre16.g6686<br>00.t1.1                | VSLDQTPDS <sub>219</sub> PLGSVNSIDQLLGTVDSEETIGDKLALK                                        | 1 | 175.122161 | S(2): 0.0; T(6): 0.0; S(9): 99.7; S(13): 0.3; S(16): 0.0; T(23): 0.0; S(25): 0.0; S(27): 0.0; T(30): 0.0             |
|                                       | <b>VSLDQTPDS<sub>219</sub>PLGSVNSIDQLLGTVS<sub>235</sub>DSEETIGDKLALK</b>                    | 2 | 133.725948 | S(2): 0.0; T(6): 0.0; S(9): 99.4; S(13): 0.3; S(16): 0.3; T(23): 0.3; S(25): 97.8; S(27): 1.9; T(30): 0.0            |
|                                       | VSLDQTPDSPLS <sub>223</sub> VNSIDQLLGTVS <sub>235</sub> DSEETIGDK                            | 2 | 96.1133108 | S(2): 0.0; T(6): 0.1; S(9): 0.4; S(13): 96.9; S(16): 2.5; T(23): 2.5; S(25): 95.0; S(27): 2.5; T(30): 0.0            |
| PGM1b                                 | <b>AVGLPSDADMGNS<sub>148</sub>EVGHNALGSGQVVDQGAR</b>                                         | 1 | 164.404607 | S(6): 0.0; S(13): 100.0; S(22): 0.0                                                                                  |
|                                       | KLESAAT <sub>296</sub> VAER                                                                  | 1 | 132.01026  | S(4): 0.0; T(7): 100.0                                                                                               |
|                                       | VAVAPS <sub>320</sub> RQGS <sub>324</sub> T <sub>325</sub> KVAVAPPSRPGS <sub>337</sub> GK    | 3 | 111.781445 | S(6): 11.8; S(10): 88.4; T(11): 99.8; S(19): 1.8; S(23): 98.2                                                        |
|                                       | QGS <sub>324</sub> T <sub>325</sub> KVAVAPPSRPGSGK                                           | 1 | 133.099006 | S(3): 91.3; T(4): 8.7; S(12): 0.0; S(16): 0.0                                                                        |
|                                       | QGS <sub>324</sub> TKVAVAPPS <sub>333</sub> RPGS <sub>337</sub> GK                           | 3 | 44.5661717 | S(3): 87.6; T(4): 12.5; S(12): 99.9; S(16): 100.0                                                                    |
| Cre26.g7731<br>00.t1.1<br>(Fibrillin) | QGS <sub>324</sub> T <sub>325</sub> KVAVAPPS <sub>333</sub> RPGS <sub>337</sub> GKVAVAPAAPAR | 3 | 88.4543771 | S(3): 50.1; T(4): 50.1; S(12): 99.8; S(16): 100.0                                                                    |
|                                       | <b>VAVAPPS<sub>333</sub>RPGSGKVAVAPAAPAR</b>                                                 | 1 | 191.460996 | S(7): 99.3; S(11): 0.7                                                                                               |
|                                       | <b>VAVAPPS<sub>333</sub>RPGS<sub>337</sub>GKVAVAPAAPAR</b>                                   | 2 | 170.550444 | S(7): 100.0; S(11): 100.0                                                                                            |
|                                       | <b>VAVAPPSRPGS<sub>337</sub>GK</b>                                                           | 1 | 208.761831 | S(7): 0.0; S(11): 100.0                                                                                              |
|                                       | VAVAPPS <sub>333</sub> RPGS <sub>337</sub> GK                                                | 2 | 141.364916 | S(7): 100.0; S(11): 100.0                                                                                            |
|                                       | VAVAPAAPARS <sub>350</sub> AS <sub>352</sub> VR                                              | 2 | 131.504347 | S(11): 100.0; S(13): 100.0                                                                                           |
|                                       | <b>Ac-SGDDPETS<sub>9</sub>FHFQAVQQPR</b>                                                     | 1 | 136.027337 | S(1): 0.0; T(7): 0.8; S(8): 99.2                                                                                     |
|                                       | Ac-S <sub>2</sub> GDDPET <sub>8</sub> S <sub>9</sub> FHFQAVQQPR                              | 2 | 98.4391931 | S(1): 100.0; T(7): 9.2; S(8): 90.8                                                                                   |
| Cre20.g7592<br>50<br>(PF07059)        | WT <sub>21</sub> RAES <sub>25</sub> LGDAANLVLEGG                                             | 2 | 162.557741 | T(2): 100.0; S(6): 100.0                                                                                             |
|                                       | <b>AES<sub>25</sub>LGDAANLVLEGG</b>                                                          | 1 | 193.160292 | S(3): 100.0                                                                                                          |
|                                       | <b>S<sub>216</sub>NSMAAFPANTAAAAAAGSASTR</b>                                                 | 1 | 168.011681 | S(1): 99.1; S(3): 0.9; T(11): 0.0; S(20): 0.0; S(22): 0.0; T(23): 0.0                                                |
|                                       | <b>SNSM(ox)AAPFANT<sub>226</sub>AAAAAAGSASTR</b>                                             | 1 | 116.001038 | S(1): 0.0; S(3): 0.0; T(11): 99.8; S(20): 0.2; S(22): 0.0; T(23): 0.0                                                |
|                                       | VGS <sub>595</sub> ETTAATAAAAAATIAR                                                          | 1 | 217.620392 | S(3): 100.0; T(5): 0.0; T(6): 0.0; T(9): 0.0; T(15): 0.0                                                             |
| Cre06.g2617<br>50.t1.1                | <b>SVS<sub>359</sub>PQPDVAK</b>                                                              | 1 | 180.823896 | S(1): 0.0; S(3): 100.0                                                                                               |
|                                       | S <sub>357</sub> VS <sub>359</sub> PQPDVAK                                                   | 2 | 131.708728 | S(1): 100.0; S(3): 100.0                                                                                             |

|                        |                                                                                 |   |            |                                                                         |
|------------------------|---------------------------------------------------------------------------------|---|------------|-------------------------------------------------------------------------|
| (Bestrophin)           | <b>AGVGAVAPGAPLM(ox)PQAPVRSPTSPT<sub>400</sub>R</b>                             | 1 | 177.723555 | S(20): 0.0; S(22): 0.0; T(24): 100.0                                    |
|                        | SPS <sub>398</sub> PTRS <sub>402</sub> VS <sub>404</sub> PSFPR                  | 3 | 95.4008966 | S(1): 0.5; S(3): 98.9; T(5): 1.1; S(7): 99.4; S(9): 99.4; S(11): 0.6    |
|                        | SPSPT <sub>400</sub> RS <sub>402</sub> VSPSFPR                                  | 2 | 113.176274 | S(1): 0.0; S(3): 0.0; T(5): 99.6; S(7): 99.6; S(9): 0.7; S(11): 0.0     |
|                        | SVS <sub>404</sub> PSFPR                                                        | 1 | 133.275124 | S(1): 0.0; S(3): 100.0; S(5): 0.0                                       |
|                        | <b>S<sub>585</sub>RS<sub>587</sub>GNGGGGSSDTELSEANRPR</b>                       | 1 | 187.002052 | S(1): 93.1; S(3): 6.9; S(10): 0.0; S(11): 0.0; T(13): 0.0; S(16): 0.0   |
|                        | SGNGGGGS <sub>594</sub> SDTELSEANRPR                                            | 1 | 129.579849 | S(1): 0.7; S(8): 98.5; S(9): 0.7; T(11): 0.0; S(14): 0.0                |
|                        | S <sub>585</sub> RS <sub>587</sub> GNGGGGSSDTELSEANRPR                          | 2 | 74.7590117 | S(1): 100.0; S(3): 99.3; S(10): 0.3; S(11): 0.3; T(13): 0.1; S(16): 0.0 |
|                        | S <sub>587</sub> GNGGGGSSDTELSEANRPR                                            | 1 | 130.496507 | S(1): 100.0; S(8): 0.0; S(9): 0.0; T(11): 0.0; S(14): 0.0               |
| CDS1                   | <b>AQNGEGMDPPSGEPS<sub>101</sub>S<sub>102</sub>KS<sub>104</sub>GSALDLR</b>      | 2 | 148.997659 | S(11): 0.0; S(15): 91.1; S(16): 91.2; S(18): 15.6; S(20): 2.1           |
|                        | <b>AQNGEGM(ox)DPPSGEP S<sub>101</sub>S<sub>102</sub>KS<sub>104</sub>GSALDLR</b> | 2 | 157.545892 | S(11): 0.0; S(15): 90.9; S(16): 90.9; S(18): 15.9; S(20): 2.2           |
| HSP70B                 | RMS <sub>117</sub> EVGSESTQVPYR                                                 | 1 | 163.44525  | S(3): 100.0; S(7): 0.0; S(9): 0.0; T(10): 0.0; Y(14): 0.0               |
| Cre17.g7374<br>50.t1.2 | <b>ISAGAQAS<sub>2481</sub>PTVS<sub>2485</sub>QGPAP</b>                          | 2 | 99.1102601 | S(2): 0.0; S(8): 98.9; T(10): 1.2; S(12): 99.9                          |
|                        | <b>ISAGAQAS<sub>2481</sub>PT<sub>2486</sub>VSQGPAP</b>                          | 1 | 162.381103 | S(2): 0.0; S(8): 48.4; T(10): 48.4; S(12): 3.2                          |
| Cre06.g2841<br>00.t1.1 | <b>S<sub>483</sub>HHNQSVSVGQLNPIR</b>                                           | 1 | 186.107204 | S(1): 99.6; S(6): 0.4; S(8): 0.0                                        |
|                        | <b>SHHNQS<sub>488</sub>VSVGQLNPIR</b>                                           | 1 | 141.380957 | S(1): 0.5; S(6): 99.5; S(8): 0.0                                        |
|                        | <b>SHHNQSVS<sub>490</sub>VGQLNPIR</b>                                           | 1 | 209.083848 | S(1): 0.0; S(6): 0.0; S(8): 100.0                                       |
|                        | <b>SHHNQS<sub>488</sub>VS<sub>490</sub>VGQLNPIR</b>                             | 2 | 160.23552  | S(1): 0.0; S(6): 100.0; S(8): 100.0                                     |
